# Supplementary material for: H2S Regulation of Metabolism in Cucumber in Response to Salt-Stress Through Transcriptome and Proteome Analysis
Source: Front Plant Sci. 2020 Aug 19;11:1283. doi: 10.3389/fpls.2020.01283 (PMC7466724; doi:10.3389/fpls.2020.01283)
Supplement: Supplementary file 7 [file Table_3.xls]

## Sheet: S vs C
Table S3 KEGG pathway analysis of DEGs at transcriptome levels in S vs C.
PathwayID	Pathway	Level1	Level2	Up_number	Down_number	DEG_number	total_number	Pvalue	FDR	Up_gene	Down_gene	URL
csv00195	Photosynthesis	Metabolism	Energy metabolism	1	26	27	33	2.14107e-13	2.52646e-11	Csa_6G045160	Csa_4G063440,Csa_3G875430,Csa_1G062930,Csa_5G592810,Csa_2G381850,Csa_2G010330,Csa_6G525340,Csa_6G016970,Csa_1G066480,Csa_2G074240,Csa_3G222800,Csa_3G483830,Csa_6G488340,Csa_3G119660,Csa_5G505230,Csa_7G046100,Csa_1G714680,Csa_6G483300,Csa_3G222790,Csa_3G414060,Csa_4G064020,Csa_1G168350,Csa_7G378440,Csa_3G060980,Csa_7G047350,Csa_3G147780	http://www.kegg.jp/kegg-bin/show_pathway?map00195/K02695%09%23FFFFFF,green/K08902%09%23FFFFFF,green/K02717%09%23FFFFFF,green/K02698%09%23FFFFFF,green/K02716%09%23FFFFFF,green/K02699%09%23FFFFFF,green/K02701%09%23FFFFFF,green/K02639%09%23FFFFFF,purple/K02636%09%23FFFFFF,green/K14332%09%23FFFFFF,green/K02723%09%23FFFFFF,green/K02638%09%23FFFFFF,green/K08901%09%23FFFFFF,green/K02692%09%23FFFFFF,gree…
csv00196	Photosynthesis - antenna proteins	Metabolism	Energy metabolism	0	15	15	17	7.92293e-09	4.67453e-07	-	Csa_1G033310,Csa_1G630330,Csa_5G589390,Csa_6G139750,Csa_5G490820,Csa_5G646700,Csa_6G522690,Csa_7G033300,Csa_6G057170,Csa_4G308550,Csa_1G009810,Csa_3G099680,Csa_1G445860,Csa_1G597160,Csa_6G522680	http://www.kegg.jp/kegg-bin/show_pathway?map00196/K08916%09%23FFFFFF,green/K08917%09%23FFFFFF,green/K08907%09%23FFFFFF,green/K08912%09%23FFFFFF,green/K08915%09%23FFFFFF,green/K08908%09%23FFFFFF,green/K08914%09%23FFFFFF,green/K08910%09%23FFFFFF,green/K08913%09%23FFFFFF,green/K08909%09%23FFFFFF,green/
csv00350	Tyrosine metabolism	Metabolism	Amino acid metabolism	15	4	19	31	1.77423e-06	6.77405e-05	Csa_5G158580,Csa_4G088750,Csa_3G889160,Csa_4G000870,Csa_6G361260,Csa_4G629470,Csa_1G004100,Csa_7G320050,Csa_6G361240,Csa_2G382520,Csa_1G044860,Csa_3G164480,Csa_6G511740,Csa_6G155030,Csa_1G073640	Csa_6G423470,Csa_5G147470,Csa_4G314440,Csa_2G336130	http://www.kegg.jp/kegg-bin/show_pathway?map00350/K01555%09%23FFFFFF,red/K01800%09%23FFFFFF,green/K00422%09%23FFFFFF,red/K00121%09%23FFFFFF,red/K00276%09%23FFFFFF,purple/K01557%09%23FFFFFF,red/K15849%09%23FFFFFF,red/K18857%09%23FFFFFF,red/K14454%09%23FFFFFF,red/K07253%09%23FFFFFF,green/K00815%09%23FFFFFF,red/K00451%09%23FFFFFF,red/K00001%09%23FFFFFF,purple/K00811%09%23FFFFFF,red/
csv00360	Phenylalanine metabolism	Metabolism	Amino acid metabolism	16	7	23	42	2.29629e-06	6.77405e-05	Csa_5G158580,Csa_2G264020,Csa_7G430240,Csa_6G445240,Csa_3G889160,Csa_4G000870,Csa_4G629470,Csa_1G004100,Csa_6G147460,Csa_2G382520,Csa_6G405960,Csa_1G590300,Csa_6G446290,Csa_3G234000,Csa_7G430250,Csa_6G155030	Csa_6G445770,Csa_6G423470,Csa_4G008780,Csa_6G445750,Csa_6G445760,Csa_4G314440,Csa_1G570120	http://www.kegg.jp/kegg-bin/show_pathway?map00360/K01904%09%23FFFFFF,red/K00074%09%23FFFFFF,red/K00276%09%23FFFFFF,purple/K15849%09%23FFFFFF,red/K10775%09%23FFFFFF,purple/K01426%09%23FFFFFF,purple/K14454%09%23FFFFFF,red/K07253%09%23FFFFFF,green/K00815%09%23FFFFFF,red/K00811%09%23FFFFFF,red/
csv00710	Carbon fixation in photosynthetic organisms	Metabolism	Energy metabolism	11	14	25	52	1.78567e-05	0.000421418	Csa_3G889160,Csa_5G611700,Csa_3G117980,Csa_7G239010,Csa_5G576660,Csa_7G448000,Csa_5G577360,Csa_6G497180,Csa_6G077460,Csa_3G750920,Csa_2G349020	Csa_1G038360,Csa_4G664300,Csa_4G307360,Csa_2G011530,Csa_5G609710,Csa_5G198220,Csa_7G195260,Csa_1G554560,Csa_7G452890,Csa_1G574870,Csa_5G598730,Csa_4G307350,Csa_6G136020,Csa_3G638540	http://www.kegg.jp/kegg-bin/show_pathway?map00710/K00025%09%23FFFFFF,red/K00814%09%23FFFFFF,red/K00927%09%23FFFFFF,purple/K01610%09%23FFFFFF,red/K01100%09%23FFFFFF,green/K00855%09%23FFFFFF,green/K14272%09%23FFFFFF,purple/K00029%09%23FFFFFF,green/K14454%09%23FFFFFF,red/K00615%09%23FFFFFF,red/K01807%09%23FFFFFF,purple/K01623%09%23FFFFFF,purple/K03841%09%23FFFFFF,green/K01783%09%23FFFFFF,green/K0159…
csv00910	Nitrogen metabolism	Metabolism	Energy metabolism	4	12	16	27	2.18275e-05	0.000429275	Csa_4G182270,Csa_4G192110,Csa_3G134790,Csa_3G304140	Csa_5G410730,Csa_6G448150,Csa_1G120470,Csa_6G446560,Csa_3G821030,Csa_3G776970,Csa_4G377160,Csa_5G383350,Csa_1G120450,Csa_3G836520,Csa_3G150160,Csa_5G383850	http://www.kegg.jp/kegg-bin/show_pathway?map00910/K01915%09%23FFFFFF,purple/K00284%09%23FFFFFF,green/K00261%09%23FFFFFF,red/K01725%09%23FFFFFF,red/K01674%09%23FFFFFF,green/K10534%09%23FFFFFF,green/K01673%09%23FFFFFF,purple/
csv00940	Phenylpropanoid biosynthesis	Metabolism	Biosynthesis of other secondary metabolites	29	8	37	94	5.71936e-05	0.00096412	Csa_3G736970,Csa_6G067410,Csa_2G406630,Csa_7G430240,Csa_7G071700,Csa_4G285750,Csa_6G445240,Csa_6G504560,Csa_4G031070,Csa_6G495000,Csa_4G091880,Csa_6G405960,Csa_1G586250,Csa_1G590300,Csa_6G446290,Csa_5G167220,Csa_4G285740,Csa_4G026850,Csa_3G904120,Csa_6G490230,Csa_4G443110,Csa_7G430250,Csa_3G881810,Csa_6G445010,Csa_1G611290,Csa_4G285730,Csa_6G147460,Csa_3G874320,Csa_6G213910	Csa_3G179180,Csa_6G445770,Csa_1G064150,Csa_2G300950,Csa_4G008780,Csa_6G445750,Csa_7G058560,Csa_6G445760	http://www.kegg.jp/kegg-bin/show_pathway?map00940/K13066%09%23FFFFFF,red/K00430%09%23FFFFFF,purple/K10775%09%23FFFFFF,purple/K01188%09%23FFFFFF,red/K00083%09%23FFFFFF,purple/K01904%09%23FFFFFF,red/K05350%09%23FFFFFF,purple/
csv00220	Arginine biosynthesis	Metabolism	Amino acid metabolism	13	5	18	35	8.88929e-05	0.00131117	Csa_4G192110,Csa_3G889160,Csa_3G902910,Csa_2G382520,Csa_3G859690,Csa_3G734910,Csa_3G902920,Csa_6G117740,Csa_3G304140,Csa_2G370510,Csa_3G902410,Csa_7G448000,Csa_2G349020	Csa_5G410730,Csa_6G448150,Csa_1G050380,Csa_5G598730,Csa_3G150160	http://www.kegg.jp/kegg-bin/show_pathway?map00220/K00611%09%23FFFFFF,red/K00620%09%23FFFFFF,red/K01915%09%23FFFFFF,purple/K00814%09%23FFFFFF,red/K14272%09%23FFFFFF,purple/K01438%09%23FFFFFF,red/K14454%09%23FFFFFF,red/K01940%09%23FFFFFF,green/K01755%09%23FFFFFF,red/K00261%09%23FFFFFF,red/K14677%09%23FFFFFF,red/K00811%09%23FFFFFF,red/
csv00280	Valine, leucine and isoleucine degradation	Metabolism	Amino acid metabolism	17	0	17	33	0.000135893	0.00178171	Csa_3G164520,Csa_7G387180,Csa_4G326550,Csa_7G448900,Csa_3G823050,Csa_1G173130,Csa_7G073600,Csa_3G133140,Csa_6G395130,Csa_3G127100,Csa_6G483270,Csa_2G129150,Csa_3G624070,Csa_2G352930,Csa_7G066830,Csa_3G164470,Csa_4G608110	-	http://www.kegg.jp/kegg-bin/show_pathway?map00280/K00166%09%23FFFFFF,red/K00249%09%23FFFFFF,red/K01640%09%23FFFFFF,red/K01968%09%23FFFFFF,red/K05605%09%23FFFFFF,red/K00826%09%23FFFFFF,red/K01969%09%23FFFFFF,red/K00827%09%23FFFFFF,red/K14085%09%23FFFFFF,red/K07513%09%23FFFFFF,red/K00626%09%23FFFFFF,red/K09699%09%23FFFFFF,red/K00140%09%23FFFFFF,red/
csv00410	beta-Alanine metabolism	Metabolism	Metabolism of other amino acids	13	2	15	29	0.00031866	0.00376019	Csa_5G158580,Csa_7G448900,Csa_7G065130,Csa_1G042970,Csa_3G604620,Csa_1G004100,Csa_4G608110,Csa_3G164520,Csa_7G426460,Csa_3G127100,Csa_1G031730,Csa_7G066830,Csa_2G000460	Csa_6G423470,Csa_5G348050	http://www.kegg.jp/kegg-bin/show_pathway?map00410/K00207%09%23FFFFFF,red/K01580%09%23FFFFFF,purple/K00249%09%23FFFFFF,red/K01431%09%23FFFFFF,red/K05605%09%23FFFFFF,red/K13366%09%23FFFFFF,red/K14085%09%23FFFFFF,red/K00276%09%23FFFFFF,purple/K00797%09%23FFFFFF,red/K00140%09%23FFFFFF,red/K12259%09%23FFFFFF,red/
csv04075	Plant hormone signal transduction	Environmental Information Processing	Signal transduction	24	43	67	213	0.000362936	0.00389331	Csa_3G389850,Csa_2G350290,Csa_5G374730,Csa_6G499740,Csa_7G009140,Csa_3G199660,Csa_2G258730,Csa_6G008720,Csa_1G422990,Csa_1G572420,Csa_3G516540,Csa_5G201310,Csa_6G493310,Csa_6G125240,Csa_7G391240,Csa_7G070254,Csa_3G516530,Csa_3G017090,Csa_3G178550,Csa_4G036580,Csa_1G422480,Csa_3G444560,Csa_7G375820,Csa_2G035330	Csa_1G524760,Csa_3G822100,Csa_1G408720,Csa_3G731880,Csa_3G011620,Csa_1G600830,Csa_2G170820,Csa_7G008440,Csa_5G603910,Csa_4G615240,Csa_7G238400,Csa_4G312880,Csa_7G072880,Csa_7G378520,Csa_3G651720,Csa_5G077780,Csa_2G200440,Csa_3G902310,Csa_7G060160,Csa_6G011040,Csa_2G236620,Csa_3G134550,Csa_1G207820,Csa_4G645980,Csa_2G200420,Csa_7G008430,Csa_5G148790,Csa_1G042920,Csa_7G405830,Csa_2G011420,Csa_3G143…	http://www.kegg.jp/kegg-bin/show_pathway?map04075/K14505%09%23FFFFFF,purple/K14498%09%23FFFFFF,purple/K14487%09%23FFFFFF,red/K14497%09%23FFFFFF,purple/K13449%09%23FFFFFF,red/K14488%09%23FFFFFF,purple/K14490%09%23FFFFFF,purple/K14496%09%23FFFFFF,green/K14484%09%23FFFFFF,purple/K13416%09%23FFFFFF,green/K13464%09%23FFFFFF,green/K14509%09%23FFFFFF,green/K14493%09%23FFFFFF,red/K13946%09%23FFFFFF,purpl…
csv00592	alpha-Linolenic acid metabolism	Metabolism	Lipid metabolism	12	2	14	27	0.000488974	0.0047192	Csa_1G433610,Csa_2G129150,Csa_5G098480,Csa_3G624070,Csa_2G415540,Csa_5G622450,Csa_7G320050,Csa_3G133140,Csa_2G093800,Csa_3G829270,Csa_3G002690,Csa_3G731060	Csa_3G829250,Csa_2G360780	http://www.kegg.jp/kegg-bin/show_pathway?map00592/K01723%09%23FFFFFF,green/K05894%09%23FFFFFF,red/K22389%09%23FFFFFF,red/K10529%09%23FFFFFF,purple/K08241%09%23FFFFFF,red/K18857%09%23FFFFFF,red/K00232%09%23FFFFFF,red/K07513%09%23FFFFFF,red/K10526%09%23FFFFFF,red/K01047%09%23FFFFFF,red/
csv00071	Fatty acid degradation	Metabolism	Lipid metabolism	13	3	16	33	0.000519912	0.0047192	Csa_7G448900,Csa_2G129150,Csa_6G361260,Csa_3G624070,Csa_6G007970,Csa_2G415540,Csa_3G164520,Csa_7G320050,Csa_6G361240,Csa_1G173130,Csa_3G133140,Csa_1G044860,Csa_3G731060	Csa_3G141770,Csa_5G147470,Csa_2G238260	http://www.kegg.jp/kegg-bin/show_pathway?map00071/K01897%09%23FFFFFF,purple/K00249%09%23FFFFFF,red/K00121%09%23FFFFFF,red/K07517%09%23FFFFFF,green/K14085%09%23FFFFFF,red/K18857%09%23FFFFFF,red/K00232%09%23FFFFFF,red/K07513%09%23FFFFFF,red/K00626%09%23FFFFFF,red/K00001%09%23FFFFFF,purple/
csv00950	Isoquinoline alkaloid biosynthesis	Metabolism	Biosynthesis of other secondary metabolites	8	1	9	15	0.00134591	0.0113441	Csa_5G158580,Csa_3G889160,Csa_4G000870,Csa_4G629470,Csa_1G004100,Csa_2G382520,Csa_6G155030,Csa_1G073640	Csa_6G423470	http://www.kegg.jp/kegg-bin/show_pathway?map00950/K00276%09%23FFFFFF,purple/K15849%09%23FFFFFF,red/K14454%09%23FFFFFF,red/K00815%09%23FFFFFF,red/K00422%09%23FFFFFF,red/K00811%09%23FFFFFF,red/
csv00250	Alanine, aspartate and glutamate metabolism	Metabolism	Amino acid metabolism	12	7	19	46	0.00185945	0.0141669	Csa_3G889160,Csa_4G056830,Csa_7G448000,Csa_7G189190,Csa_4G326550,Csa_4G192110,Csa_5G585380,Csa_2G382520,Csa_1G031730,Csa_3G304140,Csa_2G370510,Csa_2G349020	Csa_1G050380,Csa_5G348050,Csa_3G150160,Csa_5G410730,Csa_6G448150,Csa_4G618430,Csa_5G598730	http://www.kegg.jp/kegg-bin/show_pathway?map00250/K16871%09%23FFFFFF,purple/K01580%09%23FFFFFF,purple/K01915%09%23FFFFFF,purple/K01955%09%23FFFFFF,red/K00814%09%23FFFFFF,red/K00827%09%23FFFFFF,red/K14272%09%23FFFFFF,purple/K14454%09%23FFFFFF,red/K01940%09%23FFFFFF,green/K01755%09%23FFFFFF,red/K00261%09%23FFFFFF,red/K01956%09%23FFFFFF,red/K00811%09%23FFFFFF,red/
csv00040	Pentose and glucuronate interconversions	Metabolism	Carbohydrate metabolism	12	14	26	70	0.00192094	0.0141669	Csa_2G049960,Csa_1G597780,Csa_3G164510,Csa_1G569210,Csa_7G447990,Csa_7G343850,Csa_6G447060,Csa_6G514890,Csa_7G343870,Csa_3G126810,Csa_2G361760,Csa_3G730760	Csa_3G624020,Csa_1G038360,Csa_4G293240,Csa_7G404800,Csa_4G043950,Csa_5G622520,Csa_2G350210,Csa_4G094000,Csa_3G646640,Csa_3G133180,Csa_2G326460,Csa_1G049960,Csa_7G414390,Csa_2G155600	http://www.kegg.jp/kegg-bin/show_pathway?map00040/K00002%09%23FFFFFF,red/K00012%09%23FFFFFF,green/K01728%09%23FFFFFF,purple/K01783%09%23FFFFFF,green/K01213%09%23FFFFFF,green/K01051%09%23FFFFFF,purple/K01805%09%23FFFFFF,red/
csv00960	Tropane, piperidine and pyridine alkaloid biosynthesis	Metabolism	Biosynthesis of other secondary metabolites	8	1	9	16	0.00249318	0.0173056	Csa_5G158580,Csa_2G382520,Csa_6G155030,Csa_4G000870,Csa_1G004100,Csa_3G733970,Csa_4G629470,Csa_3G889160	Csa_6G423470	http://www.kegg.jp/kegg-bin/show_pathway?map00960/K00276%09%23FFFFFF,purple/K15849%09%23FFFFFF,red/K14454%09%23FFFFFF,red/K08081%09%23FFFFFF,red/K00815%09%23FFFFFF,red/K00811%09%23FFFFFF,red/
csv00640	Propanoate metabolism	Metabolism	Carbohydrate metabolism	11	0	11	22	0.00288684	0.0179866	Csa_4G092990,Csa_5G396020,Csa_4G608110,Csa_3G164520,Csa_1G043130,Csa_1G173130,Csa_6G395130,Csa_3G127100,Csa_6G483270,Csa_7G066830,Csa_3G164470	-	http://www.kegg.jp/kegg-bin/show_pathway?map00640/K00166%09%23FFFFFF,red/K11262%09%23FFFFFF,red/K02160%09%23FFFFFF,red/K00249%09%23FFFFFF,red/K05605%09%23FFFFFF,red/K09699%09%23FFFFFF,red/K00626%09%23FFFFFF,red/K01899%09%23FFFFFF,red/K00140%09%23FFFFFF,red/
csv00906	Carotenoid biosynthesis	Metabolism	Metabolism of terpenoids and polyketides	9	3	12	25	0.00289615	0.0179866	Csa_4G280510,Csa_4G269130,Csa_5G152820,Csa_4G001730,Csa_4G015720,Csa_5G320430,Csa_4G056600,Csa_3G183920,Csa_4G011080	Csa_6G106700,Csa_2G000360,Csa_6G523440	http://www.kegg.jp/kegg-bin/show_pathway?map00906/K17912%09%23FFFFFF,green/K09840%09%23FFFFFF,green/K14593%09%23FFFFFF,red/K09843%09%23FFFFFF,red/K15746%09%23FFFFFF,red/K06444%09%23FFFFFF,green/K15744%09%23FFFFFF,red/K02293%09%23FFFFFF,red/K02291%09%23FFFFFF,red/K09842%09%23FFFFFF,red/
csv00330	Arginine and proline metabolism	Metabolism	Amino acid metabolism	15	2	17	42	0.00409363	0.0241524	Csa_7G448900,Csa_1G025890,Csa_2G264020,Csa_3G889160,Csa_3G150820,Csa_5G643300,Csa_4G179110,Csa_3G604620,Csa_2G036680,Csa_7G426460,Csa_2G382520,Csa_4G017130,Csa_6G494930,Csa_3G150200,Csa_2G000460	Csa_3G733920,Csa_1G570120	http://www.kegg.jp/kegg-bin/show_pathway?map00330/K12657%09%23FFFFFF,green/K00819%09%23FFFFFF,red/K01259%09%23FFFFFF,red/K00318%09%23FFFFFF,red/K13366%09%23FFFFFF,red/K14085%09%23FFFFFF,red/K01611%09%23FFFFFF,red/K01426%09%23FFFFFF,purple/K14454%09%23FFFFFF,red/K00472%09%23FFFFFF,red/K00797%09%23FFFFFF,red/K00811%09%23FFFFFF,red/K12259%09%23FFFFFF,red/
csv00400	Phenylalanine, tyrosine and tryptophan biosynthesis	Metabolism	Amino acid metabolism	12	4	16	39	0.00451922	0.0253937	Csa_3G889160,Csa_5G638330,Csa_4G000870,Csa_4G629470,Csa_1G064170,Csa_3G843770,Csa_2G417830,Csa_2G382520,Csa_7G064020,Csa_6G487590,Csa_2G008130,Csa_6G155030	Csa_6G499800,Csa_1G145980,Csa_6G513690,Csa_2G296130	http://www.kegg.jp/kegg-bin/show_pathway?map00400/K01695%09%23FFFFFF,red/K01696%09%23FFFFFF,red/K15227%09%23FFFFFF,red/K00891%09%23FFFFFF,purple/K15849%09%23FFFFFF,red/K01850%09%23FFFFFF,red/K14454%09%23FFFFFF,red/K00815%09%23FFFFFF,red/K05359%09%23FFFFFF,purple/K00811%09%23FFFFFF,red/K01626%09%23FFFFFF,purple/
csv00630	Glyoxylate and dicarboxylate metabolism	Metabolism	Carbohydrate metabolism	9	11	20	54	0.00638474	0.0342454	Csa_4G658590,Csa_2G420990,Csa_3G117980,Csa_1G050360,Csa_1G173130,Csa_3G304140,Csa_3G645990,Csa_3G836500,Csa_2G349020	Csa_3G821030,Csa_1G654900,Csa_3G903520,Csa_5G609710,Csa_3G150160,Csa_5G410730,Csa_6G448150,Csa_5G598730,Csa_1G062310,Csa_3G848200,Csa_6G497310	http://www.kegg.jp/kegg-bin/show_pathway?map00630/K02437%09%23FFFFFF,green/K01637%09%23FFFFFF,red/K11517%09%23FFFFFF,red/K00025%09%23FFFFFF,red/K03781%09%23FFFFFF,red/K19269%09%23FFFFFF,green/K14272%09%23FFFFFF,purple/K00626%09%23FFFFFF,red/K01638%09%23FFFFFF,red/K01915%09%23FFFFFF,purple/K18121%09%23FFFFFF,green/K00600%09%23FFFFFF,green/K00605%09%23FFFFFF,green/K00284%09%23FFFFFF,green/K00122%09…
csv00650	Butanoate metabolism	Metabolism	Carbohydrate metabolism	5	3	8	15	0.00670173	0.0343828	Csa_3G823050,Csa_4G056830,Csa_1G173130,Csa_3G234000,Csa_1G031730	Csa_5G348050,Csa_4G618430,Csa_3G848200	http://www.kegg.jp/kegg-bin/show_pathway?map00650/K16871%09%23FFFFFF,purple/K01580%09%23FFFFFF,purple/K18121%09%23FFFFFF,green/K00626%09%23FFFFFF,red/K01640%09%23FFFFFF,red/K00074%09%23FFFFFF,red/
csv00480	Glutathione metabolism	Metabolism	Metabolism of other amino acids	16	5	21	59	0.00884036	0.0434651	Csa_4G064650,Csa_2G035460,Csa_2G035470,Csa_4G304240,Csa_4G303170,Csa_6G486750,Csa_5G523180,Csa_4G303130,Csa_4G303690,Csa_4G304760,Csa_4G303680,Csa_4G304250,Csa_3G604620,Csa_7G395820,Csa_6G507100,Csa_7G395800	Csa_3G889840,Csa_3G133890,Csa_3G882970,Csa_3G133880,Csa_1G024860	http://www.kegg.jp/kegg-bin/show_pathway?map00480/K22596%09%23FFFFFF,green/K00799%09%23FFFFFF,purple/K00031%09%23FFFFFF,red/K10807%09%23FFFFFF,red/K00434%09%23FFFFFF,purple/K01255%09%23FFFFFF,red/K00797%09%23FFFFFF,red/
csv02010	ABC transporters	Environmental Information Processing	Membrane transport	1	6	7	13	0.0105083	0.0495994	Csa_2G074190	Csa_6G521010,Csa_3G769610,Csa_5G633170,Csa_3G873270,Csa_7G396440,Csa_7G396450	http://www.kegg.jp/kegg-bin/show_pathway?map02010/K05666%09%23FFFFFF,green/K05658%09%23FFFFFF,purple/
csv04016	MAPK signaling pathway - plant	Environmental Information Processing	Signal transduction	13	18	31	98	0.0120506	0.0546913	Csa_3G389850,Csa_4G658590,Csa_4G045070,Csa_6G499740,Csa_5G152170,Csa_6G522700,Csa_6G008720,Csa_6G507520,Csa_7G070254,Csa_3G017090,Csa_3G178550,Csa_1G569450,Csa_7G375820	Csa_1G524760,Csa_3G011620,Csa_6G509020,Csa_1G042980,Csa_4G312880,Csa_3G651720,Csa_7G354520,Csa_3G902310,Csa_1G025960,Csa_7G060160,Csa_2G236620,Csa_4G645980,Csa_7G405830,Csa_7G047370,Csa_6G338080,Csa_4G050120,Csa_3G141850,Csa_3G845500	http://www.kegg.jp/kegg-bin/show_pathway?map04016/K20604%09%23FFFFFF,green/K20714%09%23FFFFFF,green/K13447%09%23FFFFFF,purple/K13424%09%23FFFFFF,green/K03781%09%23FFFFFF,red/K14498%09%23FFFFFF,purple/K13449%09%23FFFFFF,red/K14497%09%23FFFFFF,purple/K14496%09%23FFFFFF,green/K20729%09%23FFFFFF,green/K13416%09%23FFFFFF,green/K14509%09%23FFFFFF,green/K20537%09%23FFFFFF,red/K20547%09%23FFFFFF,purple/K…
csv00030	Pentose phosphate pathway	Metabolism	Carbohydrate metabolism	8	8	16	43	0.0133313	0.0582626	Csa_1G701210,Csa_5G611700,Csa_5G576660,Csa_6G077460,Csa_5G606770,Csa_2G009470,Csa_3G750920,Csa_4G097630	Csa_1G038360,Csa_4G307360,Csa_2G011530,Csa_2G361580,Csa_1G554560,Csa_7G195260,Csa_4G307350,Csa_5G139130	http://www.kegg.jp/kegg-bin/show_pathway?map00030/K01810%09%23FFFFFF,green/K00895%09%23FFFFFF,red/K03841%09%23FFFFFF,green/K01783%09%23FFFFFF,green/K00131%09%23FFFFFF,red/K01057%09%23FFFFFF,purple/K00850%09%23FFFFFF,red/K00615%09%23FFFFFF,red/K01623%09%23FFFFFF,purple/K01807%09%23FFFFFF,purple/
csv00520	Amino sugar and nucleotide sugar metabolism	Metabolism	Carbohydrate metabolism	19	11	30	98	0.0213475	0.0899645	Csa_1G267230,Csa_5G182060,Csa_5G139730,Csa_3G120500,Csa_4G002510,Csa_6G526490,Csa_1G267220,Csa_1G039880,Csa_5G139770,Csa_6G080910,Csa_6G507520,Csa_5G180280,Csa_7G378420,Csa_3G859710,Csa_7G352420,Csa_3G124840,Csa_5G139760,Csa_1G015690,Csa_2G248700	Csa_2G073000,Csa_3G300600,Csa_6G509020,Csa_5G155470,Csa_2G361580,Csa_4G094000,Csa_1G615730,Csa_6G008750,Csa_6G153460,Csa_3G149890,Csa_4G052620	http://www.kegg.jp/kegg-bin/show_pathway?map00520/K01810%09%23FFFFFF,green/K00844%09%23FFFFFF,green/K08678%09%23FFFFFF,red/K00770%09%23FFFFFF,red/K13648%09%23FFFFFF,red/K00847%09%23FFFFFF,red/K01183%09%23FFFFFF,red/K01784%09%23FFFFFF,green/K00965%09%23FFFFFF,red/K12373%09%23FFFFFF,purple/K00966%09%23FFFFFF,green/K20547%09%23FFFFFF,purple/K00012%09%23FFFFFF,green/K13379%09%23FFFFFF,red/K01809%09%2…
csv00270	Cysteine and methionine metabolism	Metabolism	Amino acid metabolism	16	3	19	58	0.0306359	0.124657	Csa_1G597100,Csa_3G889160,Csa_3G117980,Csa_4G629470,Csa_2G012660,Csa_4G637120,Csa_1G599580,Csa_3G604620,Csa_4G326550,Csa_2G036680,Csa_2G382520,Csa_7G009190,Csa_2G352930,Csa_3G002890,Csa_6G155030,Csa_3G150200	Csa_5G609660,Csa_4G361270,Csa_3G006640	http://www.kegg.jp/kegg-bin/show_pathway?map00270/K01738%09%23FFFFFF,red/K00025%09%23FFFFFF,red/K01244%09%23FFFFFF,red/K00558%09%23FFFFFF,green/K14454%09%23FFFFFF,red/K08963%09%23FFFFFF,red/K01761%09%23FFFFFF,red/K00547%09%23FFFFFF,green/K00811%09%23FFFFFF,red/K00549%09%23FFFFFF,red/K00827%09%23FFFFFF,red/K00826%09%23FFFFFF,red/K05933%09%23FFFFFF,green/K01611%09%23FFFFFF,red/K16054%09%23FFFFFF,re…
csv00130	Ubiquinone and other terpenoid-quinone biosynthesis	Metabolism	Metabolism of cofactors and vitamins	8	3	11	29	0.03229	0.127007	Csa_7G430240,Csa_2G432780,Csa_4G629470,Csa_2G059830,Csa_2G238780,Csa_3G081930,Csa_7G430250,Csa_6G155030	Csa_2G348940,Csa_6G501980,Csa_6G186370	http://www.kegg.jp/kegg-bin/show_pathway?map00130/K03809%09%23FFFFFF,purple/K01904%09%23FFFFFF,red/K09833%09%23FFFFFF,red/K00815%09%23FFFFFF,red/K05928%09%23FFFFFF,red/K03183%09%23FFFFFF,green/
csv04146	Peroxisome	Cellular Processes	Transport and catabolism	16	2	18	55	0.0351176	0.133674	Csa_4G658590,Csa_3G823050,Csa_1G571850,Csa_2G129150,Csa_1G025980,Csa_3G624070,Csa_6G007970,Csa_2G415540,Csa_3G133140,Csa_6G074530,Csa_5G523180,Csa_7G047330,Csa_3G645990,Csa_2G013250,Csa_3G731060,Csa_1G698530	Csa_6G148290,Csa_2G238260	http://www.kegg.jp/kegg-bin/show_pathway?map04146/K13348%09%23FFFFFF,red/K11147%09%23FFFFFF,red/K11517%09%23FFFFFF,red/K04564%09%23FFFFFF,red/K01897%09%23FFFFFF,purple/K01640%09%23FFFFFF,red/K03781%09%23FFFFFF,red/K13352%09%23FFFFFF,red/K00232%09%23FFFFFF,red/K00031%09%23FFFFFF,red/K07513%09%23FFFFFF,red/K04565%09%23FFFFFF,purple/
csv00073	Cutin, suberine and wax biosynthesis	Metabolism	Lipid metabolism	4	3	7	16	0.0383273	0.141332	Csa_7G451340,Csa_1G001360,Csa_6G079750,Csa_5G628130	Csa_5G153010,Csa_3G848300,Csa_6G004550	http://www.kegg.jp/kegg-bin/show_pathway?map00073/K15403%09%23FFFFFF,purple/K15398%09%23FFFFFF,green/K15400%09%23FFFFFF,red/K17991%09%23FFFFFF,red/K15404%09%23FFFFFF,red/
csv00290	Valine, leucine and isoleucine biosynthesis	Metabolism	Amino acid metabolism	6	0	6	13	0.0415732	0.148656	Csa_6G448740,Csa_6G448730,Csa_7G051370,Csa_2G352930,Csa_6G448720,Csa_3G363180	-	http://www.kegg.jp/kegg-bin/show_pathway?map00290/K00826%09%23FFFFFF,red/K00053%09%23FFFFFF,red/K01754%09%23FFFFFF,red/K01649%09%23FFFFFF,red/
csv00860	Porphyrin and chlorophyll metabolism	Metabolism	Metabolism of cofactors and vitamins	1	11	12	35	0.0558659	0.190047	Csa_5G156180	Csa_4G165920,Csa_1G000570,Csa_6G349840,Csa_2G351800,Csa_6G385090,Csa_3G151460,Csa_1G009770,Csa_2G372750,Csa_7G428980,Csa_5G470560,Csa_6G518380	http://www.kegg.jp/kegg-bin/show_pathway?map00860/K03405%09%23FFFFFF,green/K19073%09%23FFFFFF,green/K01772%09%23FFFFFF,green/K02492%09%23FFFFFF,green/K10960%09%23FFFFFF,green/K22013%09%23FFFFFF,purple/K03403%09%23FFFFFF,green/K02303%09%23FFFFFF,green/K08099%09%23FFFFFF,green/K13600%09%23FFFFFF,green/K03428%09%23FFFFFF,green/
csv00620	Pyruvate metabolism	Metabolism	Carbohydrate metabolism	13	4	17	54	0.05637	0.190047	Csa_7G448900,Csa_4G001570,Csa_4G092990,Csa_3G117980,Csa_3G848140,Csa_5G396020,Csa_1G050360,Csa_5G577360,Csa_1G173130,Csa_6G497180,Csa_4G001990,Csa_3G363180,Csa_1G062880	Csa_5G603950,Csa_7G452890,Csa_1G574870,Csa_3G076020	http://www.kegg.jp/kegg-bin/show_pathway?map00620/K00025%09%23FFFFFF,red/K00627%09%23FFFFFF,red/K11262%09%23FFFFFF,red/K02160%09%23FFFFFF,red/K01649%09%23FFFFFF,red/K00161%09%23FFFFFF,green/K01610%09%23FFFFFF,red/K01679%09%23FFFFFF,red/K14085%09%23FFFFFF,red/K00029%09%23FFFFFF,green/K01595%09%23FFFFFF,red/K00626%09%23FFFFFF,red/K01638%09%23FFFFFF,red/K18881%09%23FFFFFF,red/K01759%09%23FFFFFF,purp…
csv00061	Fatty acid biosynthesis	Metabolism	Lipid metabolism	9	1	10	28	0.0600777	0.196921	Csa_4G092990,Csa_2G350440,Csa_1G597750,Csa_5G396020,Csa_6G007970,Csa_5G576640,Csa_1G533500,Csa_4G029990,Csa_4G286380	Csa_2G238260	http://www.kegg.jp/kegg-bin/show_pathway?map00061/K00645%09%23FFFFFF,red/K00059%09%23FFFFFF,red/K11262%09%23FFFFFF,red/K01897%09%23FFFFFF,purple/K02160%09%23FFFFFF,red/K10781%09%23FFFFFF,red/K09458%09%23FFFFFF,red/K02372%09%23FFFFFF,red/K00208%09%23FFFFFF,red/
csv00010	Glycolysis / Gluconeogenesis	Metabolism	Carbohydrate metabolism	17	9	26	91	0.0669243	0.213434	Csa_7G448900,Csa_1G701210,Csa_1G014400,Csa_3G848140,Csa_6G361260,Csa_4G197830,Csa_7G239010,Csa_5G576660,Csa_6G450370,Csa_7G320050,Csa_6G361240,Csa_6G497180,Csa_1G044860,Csa_2G009470,Csa_3G750920,Csa_4G097630,Csa_3G730760	Csa_4G307360,Csa_2G361580,Csa_5G147470,Csa_7G195260,Csa_1G615730,Csa_5G603950,Csa_3G119860,Csa_4G307350,Csa_6G136020	http://www.kegg.jp/kegg-bin/show_pathway?map00010/K01810%09%23FFFFFF,green/K00895%09%23FFFFFF,red/K00844%09%23FFFFFF,green/K00161%09%23FFFFFF,green/K01792%09%23FFFFFF,green/K00927%09%23FFFFFF,purple/K01610%09%23FFFFFF,red/K14085%09%23FFFFFF,red/K00002%09%23FFFFFF,red/K01623%09%23FFFFFF,purple/K00627%09%23FFFFFF,red/K03841%09%23FFFFFF,green/K00131%09%23FFFFFF,red/K15633%09%23FFFFFF,red/K00121%09%2…
csv00770	Pantothenate and CoA biosynthesis	Metabolism	Metabolism of cofactors and vitamins	5	1	6	15	0.0822361	0.255365	Csa_7G338120,Csa_7G065130,Csa_1G042970,Csa_7G051370,Csa_2G352930	Csa_1G002720	http://www.kegg.jp/kegg-bin/show_pathway?map00770/K01598%09%23FFFFFF,green/K00826%09%23FFFFFF,red/K00207%09%23FFFFFF,red/K00053%09%23FFFFFF,red/K00606%09%23FFFFFF,red/K01431%09%23FFFFFF,red/
csv00780	Biotin metabolism	Metabolism	Metabolism of cofactors and vitamins	5	0	5	12	0.0940381	0.270646	Csa_1G597750,Csa_6G041720,Csa_4G029990,Csa_4G286380,Csa_2G350440	-	http://www.kegg.jp/kegg-bin/show_pathway?map00780/K00059%09%23FFFFFF,red/K01012%09%23FFFFFF,red/K09458%09%23FFFFFF,red/K00208%09%23FFFFFF,red/K02372%09%23FFFFFF,red/
csv00902	Monoterpenoid biosynthesis	Metabolism	Metabolism of terpenoids and polyketides	4	1	5	12	0.0940381	0.270646	Csa_7G063980,Csa_3G889760,Csa_5G190520,Csa_7G059660	Csa_4G303180	http://www.kegg.jp/kegg-bin/show_pathway?map00902/K21373%09%23FFFFFF,purple/K21374%09%23FFFFFF,red/
csv00941	Flavonoid biosynthesis	Metabolism	Biosynthesis of other secondary metabolites	4	1	5	12	0.0940381	0.270646	Csa_3G600020,Csa_5G221960,Csa_5G505170,Csa_6G108510	Csa_6G040540	http://www.kegg.jp/kegg-bin/show_pathway?map00941/K05278%09%23FFFFFF,green/K00660%09%23FFFFFF,red/K00475%09%23FFFFFF,red/K01859%09%23FFFFFF,red/
csv00604	Glycosphingolipid biosynthesis - ganglio series	Metabolism	Glycan biosynthesis and metabolism	1	1	2	3	0.118804	0.333782	Csa_5G180280	Csa_2G073000	http://www.kegg.jp/kegg-bin/show_pathway?map00604/K12373%09%23FFFFFF,purple/
csv00052	Galactose metabolism	Metabolism	Carbohydrate metabolism	6	6	12	40	0.13278	0.364372	Csa_5G601500,Csa_3G680120,Csa_4G167980,Csa_3G124840,Csa_4G097630,Csa_1G229500	Csa_1G615730,Csa_1G181330,Csa_7G407800,Csa_3G838720,Csa_4G052620,Csa_5G155470	http://www.kegg.jp/kegg-bin/show_pathway?map00052/K01784%09%23FFFFFF,green/K00965%09%23FFFFFF,red/K06611%09%23FFFFFF,green/K18819%09%23FFFFFF,purple/K06617%09%23FFFFFF,purple/K00850%09%23FFFFFF,red/K00844%09%23FFFFFF,green/
csv00500	Starch and sucrose metabolism	Metabolism	Carbohydrate metabolism	11	9	20	73	0.138632	0.371786	Csa_5G648680,Csa_6G357030,Csa_4G280410,Csa_2G307340,Csa_7G392380,Csa_3G009420,Csa_1G611290,Csa_6G080910,Csa_4G031070,Csa_3G859710,Csa_2G248700	Csa_3G017020,Csa_2G361580,Csa_1G615730,Csa_1G064150,Csa_6G153460,Csa_3G175690,Csa_3G149890,Csa_1G005560,Csa_4G028470	http://www.kegg.jp/kegg-bin/show_pathway?map00500/K01179%09%23FFFFFF,red/K01810%09%23FFFFFF,green/K01188%09%23FFFFFF,red/K00700%09%23FFFFFF,red/K05350%09%23FFFFFF,purple/K00844%09%23FFFFFF,green/K16055%09%23FFFFFF,purple/K01214%09%23FFFFFF,red/K19892%09%23FFFFFF,red/K00847%09%23FFFFFF,red/K01177%09%23FFFFFF,green/K01087%09%23FFFFFF,purple/K00975%09%23FFFFFF,purple/
csv00904	Diterpenoid biosynthesis	Metabolism	Metabolism of terpenoids and polyketides	3	1	4	10	0.148679	0.383843	Csa_7G239640,Csa_7G434970,Csa_1G439830	Csa_5G172270	http://www.kegg.jp/kegg-bin/show_pathway?map00904/K05282%09%23FFFFFF,green/K04124%09%23FFFFFF,red/K04125%09%23FFFFFF,red/K04121%09%23FFFFFF,red/
csv04626	Plant-pathogen interaction	Organismal Systems	Environmental adaptation	10	16	26	99	0.149634	0.383843	Csa_5G152170,Csa_3G782840,Csa_1G699040,Csa_6G522700,Csa_7G070254,Csa_3G854250,Csa_2G368880,Csa_5G638350,Csa_1G569450,Csa_2G000780	Csa_3G731150,Csa_5G571560,Csa_3G651720,Csa_2G406780,Csa_1G025960,Csa_7G060160,Csa_3G144210,Csa_4G011740,Csa_6G146420,Csa_6G513780,Csa_2G075440,Csa_5G608150,Csa_1G015780,Csa_2G286450,Csa_4G050120,Csa_3G845500	http://www.kegg.jp/kegg-bin/show_pathway?map04626/K13448%09%23FFFFFF,purple/K09487%09%23FFFFFF,red/K13447%09%23FFFFFF,purple/K05391%09%23FFFFFF,purple/K13459%09%23FFFFFF,green/K13424%09%23FFFFFF,green/K04368%09%23FFFFFF,red/K13413%09%23FFFFFF,green/K13449%09%23FFFFFF,red/K13456%09%23FFFFFF,red/K13425%09%23FFFFFF,green/K13412%09%23FFFFFF,purple/K13416%09%23FFFFFF,green/K13420%09%23FFFFFF,red/
csv00905	Brassinosteroid biosynthesis	Metabolism	Metabolism of terpenoids and polyketides	1	2	3	7	0.17476	0.43876	Csa_5G517880	Csa_5G202330,Csa_1G305710	http://www.kegg.jp/kegg-bin/show_pathway?map00905/K09588%09%23FFFFFF,green/K15639%09%23FFFFFF,green/K12639%09%23FFFFFF,red/
csv00260	Glycine, serine and threonine metabolism	Metabolism	Amino acid metabolism	12	5	17	63	0.1799	0.442255	Csa_5G158580,Csa_7G448900,Csa_4G197830,Csa_1G064170,Csa_1G004100,Csa_3G843770,Csa_6G448740,Csa_6G448730,Csa_4G326550,Csa_3G002370,Csa_6G448720,Csa_2G349020	Csa_6G423470,Csa_3G903520,Csa_5G598730,Csa_1G062310,Csa_6G497310	http://www.kegg.jp/kegg-bin/show_pathway?map00260/K02437%09%23FFFFFF,green/K01695%09%23FFFFFF,red/K01754%09%23FFFFFF,red/K00600%09%23FFFFFF,green/K15633%09%23FFFFFF,red/K01696%09%23FFFFFF,red/K00827%09%23FFFFFF,red/K00605%09%23FFFFFF,green/K14272%09%23FFFFFF,purple/K14085%09%23FFFFFF,red/K00276%09%23FFFFFF,purple/K00831%09%23FFFFFF,red/
csv00072	Synthesis and degradation of ketone bodies	Metabolism	Lipid metabolism	2	0	2	4	0.204292	0.472948	Csa_3G823050,Csa_1G173130	-	http://www.kegg.jp/kegg-bin/show_pathway?map00072/K00626%09%23FFFFFF,red/K01640%09%23FFFFFF,red/
csv00603	Glycosphingolipid biosynthesis - globo and isoglobo series	Metabolism	Glycan biosynthesis and metabolism	1	1	2	4	0.204292	0.472948	Csa_5G180280	Csa_2G073000	http://www.kegg.jp/kegg-bin/show_pathway?map00603/K12373%09%23FFFFFF,purple/
csv01040	Biosynthesis of unsaturated fatty acids	Metabolism	Lipid metabolism	5	0	5	15	0.20492	0.472948	Csa_2G129150,Csa_3G624070,Csa_2G415540,Csa_3G133140,Csa_3G731060	-	http://www.kegg.jp/kegg-bin/show_pathway?map01040/K00232%09%23FFFFFF,red/K07513%09%23FFFFFF,red/
csv00062	Fatty acid elongation	Metabolism	Lipid metabolism	2	6	8	27	0.208418	0.472948	Csa_5G642170,Csa_3G006780	Csa_3G144140,Csa_1G418240,Csa_2G361630,Csa_1G501850,Csa_1G267270,Csa_3G592170	http://www.kegg.jp/kegg-bin/show_pathway?map00062/K15397%09%23FFFFFF,green/K01076%09%23FFFFFF,purple/
csv01502	Vancomycin resistance	Human Diseases	Drug resistance: Antimicrobial	1	0	1	1	0.215056	0.474544	Csa_1G448950	-	http://www.kegg.jp/kegg-bin/show_pathway?map01502/K01000%09%23FFFFFF,red/
csv00051	Fructose and mannose metabolism	Metabolism	Carbohydrate metabolism	6	7	13	48	0.217164	0.474544	Csa_2G049960,Csa_1G701210,Csa_5G576660,Csa_6G080910,Csa_3G750920,Csa_4G097630	Csa_3G300600,Csa_6G405340,Csa_4G307360,Csa_7G195260,Csa_1G615730,Csa_6G008750,Csa_4G307350	http://www.kegg.jp/kegg-bin/show_pathway?map00051/K00895%09%23FFFFFF,red/K00966%09%23FFFFFF,green/K03841%09%23FFFFFF,green/K00844%09%23FFFFFF,green/K01805%09%23FFFFFF,red/K01809%09%23FFFFFF,green/K00850%09%23FFFFFF,red/K00847%09%23FFFFFF,red/K19355%09%23FFFFFF,green/K01623%09%23FFFFFF,purple/
csv00531	Glycosaminoglycan degradation	Metabolism	Glycan biosynthesis and metabolism	2	1	3	8	0.237014	0.505904	Csa_5G180280,Csa_3G165650	Csa_2G073000	http://www.kegg.jp/kegg-bin/show_pathway?map00531/K12373%09%23FFFFFF,purple/K07964%09%23FFFFFF,red/
csv04712	Circadian rhythm - plant	Organismal Systems	Environmental adaptation	3	5	8	28	0.240484	0.505904	Csa_3G600020,Csa_6G095910,Csa_2G035330	Csa_5G175170,Csa_6G055360,Csa_5G352090,Csa_5G139010,Csa_5G021300	http://www.kegg.jp/kegg-bin/show_pathway?map04712/K12130%09%23FFFFFF,green/K00660%09%23FFFFFF,red/K12133%09%23FFFFFF,red/K12126%09%23FFFFFF,red/K12116%09%23FFFFFF,green/K16221%09%23FFFFFF,green/K12124%09%23FFFFFF,green/
csv00380	Tryptophan metabolism	Metabolism	Amino acid metabolism	5	2	7	24	0.244377	0.505904	Csa_4G658590,Csa_7G448900,Csa_2G264020,Csa_2G375750,Csa_1G173130	Csa_3G619930,Csa_1G570120	http://www.kegg.jp/kegg-bin/show_pathway?map00380/K14085%09%23FFFFFF,red/K01426%09%23FFFFFF,purple/K00626%09%23FFFFFF,red/K03781%09%23FFFFFF,red/K11816%09%23FFFFFF,purple/
csv00450	Selenocompound metabolism	Metabolism	Metabolism of other amino acids	4	1	5	16	0.24871	0.505997	Csa_2G215520,Csa_1G599580,Csa_3G002890,Csa_3G144230	Csa_3G113310	http://www.kegg.jp/kegg-bin/show_pathway?map00450/K00549%09%23FFFFFF,red/K13811%09%23FFFFFF,red/K01761%09%23FFFFFF,red/K08247%09%23FFFFFF,green/
csv03050	Proteasome	Genetic Information Processing	Folding, sorting and degradation	11	0	11	42	0.281877	0.560609	Csa_3G146470,Csa_6G507070,Csa_4G297510,Csa_6G358050,Csa_7G448880,Csa_2G362420,Csa_7G325720,Csa_1G701930,Csa_2G377360,Csa_2G361820,Csa_5G643970	-	http://www.kegg.jp/kegg-bin/show_pathway?map03050/K02734%09%23FFFFFF,red/K02728%09%23FFFFFF,red/K02730%09%23FFFFFF,red/K02725%09%23FFFFFF,red/K03064%09%23FFFFFF,red/K02739%09%23FFFFFF,red/K02731%09%23FFFFFF,red/K11599%09%23FFFFFF,red/K02726%09%23FFFFFF,red/K10881%09%23FFFFFF,red/K02738%09%23FFFFFF,red/
csv00100	Steroid biosynthesis	Metabolism	Lipid metabolism	3	3	6	21	0.288008	0.560609	Csa_4G103350,Csa_7G447780,Csa_3G588470	Csa_4G409800,Csa_2G353480,Csa_7G420420	http://www.kegg.jp/kegg-bin/show_pathway?map00100/K01052%09%23FFFFFF,red/K00511%09%23FFFFFF,green/K00213%09%23FFFFFF,red/K00227%09%23FFFFFF,green/K09828%09%23FFFFFF,purple/
csv00240	Pyrimidine metabolism	Metabolism	Nucleotide metabolism	7	3	10	38	0.290337	0.560609	Csa_7G065130,Csa_1G042970,Csa_7G189190,Csa_5G585380,Csa_3G147210,Csa_6G486750,Csa_5G456730	Csa_1G587400,Csa_7G370750,Csa_1G014480	http://www.kegg.jp/kegg-bin/show_pathway?map00240/K00207%09%23FFFFFF,red/K01489%09%23FFFFFF,green/K16904%09%23FFFFFF,green/K10807%09%23FFFFFF,red/K00876%09%23FFFFFF,green/K01955%09%23FFFFFF,red/K01431%09%23FFFFFF,red/K13421%09%23FFFFFF,red/K03787%09%23FFFFFF,red/K01956%09%23FFFFFF,red/
csv00600	Sphingolipid metabolism	Metabolism	Lipid metabolism	3	2	5	17	0.294557	0.560609	Csa_6G094720,Csa_1G527930,Csa_6G188080	Csa_4G551650,Csa_1G073750	http://www.kegg.jp/kegg-bin/show_pathway?map00600/K01634%09%23FFFFFF,red/K12349%09%23FFFFFF,red/K04712%09%23FFFFFF,green/K04716%09%23FFFFFF,green/
csv00053	Ascorbate and aldarate metabolism	Metabolism	Carbohydrate metabolism	5	3	8	30	0.308814	0.578414	Csa_3G775240,Csa_7G448900,Csa_6G507100,Csa_3G434960,Csa_3G099720	Csa_1G604040,Csa_4G094000,Csa_3G889840	http://www.kegg.jp/kegg-bin/show_pathway?map00053/K14085%09%23FFFFFF,red/K00012%09%23FFFFFF,green/K00434%09%23FFFFFF,purple/K08232%09%23FFFFFF,red/K00469%09%23FFFFFF,red/K00423%09%23FFFFFF,green/
csv00565	Ether lipid metabolism	Metabolism	Lipid metabolism	5	0	5	18	0.341631	0.629883	Csa_1G433610,Csa_5G608060,Csa_2G381740,Csa_1G001490,Csa_2G032750	-	http://www.kegg.jp/kegg-bin/show_pathway?map00565/K01115%09%23FFFFFF,red/K01114%09%23FFFFFF,red/K00993%09%23FFFFFF,red/K01047%09%23FFFFFF,red/
csv00261	Monobactam biosynthesis	Metabolism	Biosynthesis of other secondary metabolites	2	0	2	6	0.381615	0.692701	Csa_2G215520,Csa_3G144230	-	http://www.kegg.jp/kegg-bin/show_pathway?map00261/K13811%09%23FFFFFF,red/
csv00564	Glycerophospholipid metabolism	Metabolism	Lipid metabolism	10	4	14	59	0.387443	0.692701	Csa_1G433610,Csa_5G608060,Csa_6G406540,Csa_4G004780,Csa_2G093800,Csa_2G381740,Csa_1G001490,Csa_5G457740,Csa_7G253210,Csa_2G032750	Csa_2G404960,Csa_6G004540,Csa_7G291720,Csa_1G025050	http://www.kegg.jp/kegg-bin/show_pathway?map00564/K00006%09%23FFFFFF,red/K22389%09%23FFFFFF,red/K01114%09%23FFFFFF,red/K13513%09%23FFFFFF,red/K13508%09%23FFFFFF,green/K18693%09%23FFFFFF,green/K06130%09%23FFFFFF,red/K00111%09%23FFFFFF,red/K05929%09%23FFFFFF,green/K01115%09%23FFFFFF,red/K14156%09%23FFFFFF,green/K00993%09%23FFFFFF,red/K01047%09%23FFFFFF,red/
csv00514	Other types of O-glycan biosynthesis	Metabolism	Glycan biosynthesis and metabolism	2	1	3	11	0.432541	0.739708	Csa_6G003390,Csa_6G401400	Csa_2G061580	http://www.kegg.jp/kegg-bin/show_pathway?map00514/K13667%09%23FFFFFF,red/K20782%09%23FFFFFF,red/K03691%09%23FFFFFF,green/
csv00908	Zeatin biosynthesis	Metabolism	Metabolism of terpenoids and polyketides	0	3	3	11	0.432541	0.739708	-	Csa_6G237640,Csa_4G343590,Csa_4G415920	http://www.kegg.jp/kegg-bin/show_pathway?map00908/K00279%09%23FFFFFF,green/K13495%09%23FFFFFF,green/K10760%09%23FFFFFF,green/
csv00760	Nicotinate and nicotinamide metabolism	Metabolism	Metabolism of cofactors and vitamins	3	0	3	11	0.432541	0.739708	Csa_3G734170,Csa_1G047450,Csa_3G147210	-	http://www.kegg.jp/kegg-bin/show_pathway?map00760/K03517%09%23FFFFFF,red/K03787%09%23FFFFFF,red/K18551%09%23FFFFFF,red/
csv00562	Inositol phosphate metabolism	Metabolism	Carbohydrate metabolism	10	0	10	43	0.448723	0.756419	Csa_3G824810,Csa_2G439240,Csa_3G434960,Csa_6G491620,Csa_7G066830,Csa_1G531190,Csa_1G001490,Csa_2G348290,Csa_4G031000,Csa_6G500600	-	http://www.kegg.jp/kegg-bin/show_pathway?map00562/K01110%09%23FFFFFF,red/K01114%09%23FFFFFF,red/K00914%09%23FFFFFF,red/K05857%09%23FFFFFF,red/K01858%09%23FFFFFF,red/K00469%09%23FFFFFF,red/K00913%09%23FFFFFF,red/K00140%09%23FFFFFF,red/
csv00460	Cyanoamino acid metabolism	Metabolism	Metabolism of other amino acids	4	2	6	25	0.457434	0.760243	Csa_1G611290,Csa_2G057070,Csa_4G031070,Csa_2G055560	Csa_1G064150,Csa_6G497310	http://www.kegg.jp/kegg-bin/show_pathway?map00460/K01188%09%23FFFFFF,red/K08248%09%23FFFFFF,red/K05350%09%23FFFFFF,purple/K00600%09%23FFFFFF,green/
csv00900	Terpenoid backbone biosynthesis	Metabolism	Metabolism of terpenoids and polyketides	6	2	8	35	0.488685	0.799314	Csa_1G600780,Csa_6G185830,Csa_7G029390,Csa_1G173130,Csa_6G487640,Csa_2G074290	Csa_6G067390,Csa_1G009770	http://www.kegg.jp/kegg-bin/show_pathway?map00900/K01823%09%23FFFFFF,red/K00021%09%23FFFFFF,red/K13789%09%23FFFFFF,red/K10960%09%23FFFFFF,green/K01662%09%23FFFFFF,green/K00626%09%23FFFFFF,red/K11778%09%23FFFFFF,red/K00919%09%23FFFFFF,red/
csv04933	AGE-RAGE signaling pathway in diabetic complications	Human Diseases	Endocrine and metabolic diseases	2	1	3	12	0.494491	0.799314	Csa_2G415560,Csa_1G531190	Csa_3G129580	http://www.kegg.jp/kegg-bin/show_pathway?map04933/K05857%09%23FFFFFF,red/K04392%09%23FFFFFF,purple/
csv00591	Linoleic acid metabolism	Metabolism	Lipid metabolism	1	0	1	3	0.516437	0.812527	Csa_1G433610	-	http://www.kegg.jp/kegg-bin/show_pathway?map00591/K01047%09%23FFFFFF,red/
csv00785	Lipoic acid metabolism	Metabolism	Metabolism of cofactors and vitamins	1	0	1	3	0.516437	0.812527	Csa_5G579610	-	http://www.kegg.jp/kegg-bin/show_pathway?map00785/K03644%09%23FFFFFF,red/
csv00430	Taurine and hypotaurine metabolism	Metabolism	Metabolism of other amino acids	1	1	2	8	0.540137	0.836361	Csa_1G031730	Csa_5G348050	http://www.kegg.jp/kegg-bin/show_pathway?map00430/K01580%09%23FFFFFF,purple/
csv00670	One carbon pool by folate	Metabolism	Metabolism of cofactors and vitamins	1	2	3	13	0.552849	0.836361	Csa_1G057010	Csa_1G062310,Csa_6G497310	http://www.kegg.jp/kegg-bin/show_pathway?map00670/K00605%09%23FFFFFF,green/K00602%09%23FFFFFF,red/K00600%09%23FFFFFF,green/
csv00750	Vitamin B6 metabolism	Metabolism	Metabolism of cofactors and vitamins	2	1	3	13	0.552849	0.836361	Csa_6G185290,Csa_3G002370	Csa_5G139120	http://www.kegg.jp/kegg-bin/show_pathway?map00750/K05275%09%23FFFFFF,green/K00831%09%23FFFFFF,red/K06215%09%23FFFFFF,red/
csv00730	Thiamine metabolism	Metabolism	Metabolism of cofactors and vitamins	0	4	4	18	0.562622	0.840372	-	Csa_6G067390,Csa_3G078800,Csa_1G528590,Csa_2G008770	http://www.kegg.jp/kegg-bin/show_pathway?map00730/K01662%09%23FFFFFF,green/K03146%09%23FFFFFF,green/K03147%09%23FFFFFF,green/K00939%09%23FFFFFF,green/
csv04145	Phagosome	Cellular Processes	Transport and catabolism	6	5	11	53	0.607204	0.871633	Csa_3G182070,Csa_1G629200,Csa_2G033940,Csa_2G364570,Csa_2G415560,Csa_2G348290	Csa_1G537560,Csa_3G129580,Csa_2G368830,Csa_2G297190,Csa_3G878880	http://www.kegg.jp/kegg-bin/show_pathway?map04145/K07375%09%23FFFFFF,purple/K04392%09%23FFFFFF,purple/K02154%09%23FFFFFF,red/K00914%09%23FFFFFF,red/K08517%09%23FFFFFF,red/K08057%09%23FFFFFF,red/K03661%09%23FFFFFF,green/K07897%09%23FFFFFF,green/
csv00909	Sesquiterpenoid and triterpenoid biosynthesis	Metabolism	Metabolism of terpenoids and polyketides	1	1	2	9	0.608123	0.871633	Csa_3G039850	Csa_2G353480	http://www.kegg.jp/kegg-bin/show_pathway?map00909/K00511%09%23FFFFFF,green/K15803%09%23FFFFFF,red/
csv00020	Citrate cycle (TCA cycle)	Metabolism	Carbohydrate metabolism	6	1	7	34	0.619095	0.871633	Csa_1G043130,Csa_6G497180,Csa_3G117980,Csa_3G848140,Csa_5G523180,Csa_4G001990	Csa_5G603950	http://www.kegg.jp/kegg-bin/show_pathway?map00020/K00031%09%23FFFFFF,red/K00025%09%23FFFFFF,red/K00627%09%23FFFFFF,red/K01899%09%23FFFFFF,red/K00161%09%23FFFFFF,green/K01610%09%23FFFFFF,red/K01679%09%23FFFFFF,red/
csv00440	Phosphonate and phosphinate metabolism	Metabolism	Metabolism of other amino acids	1	0	1	4	0.620485	0.871633	Csa_5G608060	-	http://www.kegg.jp/kegg-bin/show_pathway?map00440/K00993%09%23FFFFFF,red/
csv00943	Isoflavonoid biosynthesis	Metabolism	Biosynthesis of other secondary metabolites	0	1	1	4	0.620485	0.871633	-	Csa_6G492220	http://www.kegg.jp/kegg-bin/show_pathway?map00943/K13260%09%23FFFFFF,green/
csv03430	Mismatch repair	Genetic Information Processing	Replication and repair	4	2	6	30	0.650649	0.903254	Csa_2G004730,Csa_6G502800,Csa_4G629450,Csa_5G614640	Csa_1G464550,Csa_3G000710	http://www.kegg.jp/kegg-bin/show_pathway?map03430/K07466%09%23FFFFFF,red/K08739%09%23FFFFFF,green/K10740%09%23FFFFFF,red/K10746%09%23FFFFFF,green/K08737%09%23FFFFFF,red/K10756%09%23FFFFFF,red/
csv00920	Sulfur metabolism	Metabolism	Energy metabolism	3	1	4	22	0.728271	0.999255	Csa_2G215520,Csa_2G012660,Csa_3G144230	Csa_1G062380	http://www.kegg.jp/kegg-bin/show_pathway?map00920/K01738%09%23FFFFFF,red/K13811%09%23FFFFFF,red/K05907%09%23FFFFFF,green/
csv00511	Other glycan degradation	Metabolism	Glycan biosynthesis and metabolism	1	1	2	12	0.765724	1	Csa_5G180280	Csa_2G073000	http://www.kegg.jp/kegg-bin/show_pathway?map00511/K12373%09%23FFFFFF,purple/
csv04120	Ubiquitin mediated proteolysis	Genetic Information Processing	Folding, sorting and degradation	8	5	13	70	0.768873	1	Csa_5G141120,Csa_5G623460,Csa_6G434330,Csa_6G185330,Csa_6G344280,Csa_7G012950,Csa_4G637700,Csa_5G517720	Csa_3G880030,Csa_6G148230,Csa_3G151540,Csa_5G623730,Csa_6G448100	http://www.kegg.jp/kegg-bin/show_pathway?map04120/K10140%09%23FFFFFF,red/K03363%09%23FFFFFF,red/K06688%09%23FFFFFF,red/K10144%09%23FFFFFF,green/K03875%09%23FFFFFF,red/K03094%09%23FFFFFF,red/K10581%09%23FFFFFF,red/K03364%09%23FFFFFF,red/K04506%09%23FFFFFF,green/
csv00310	Lysine degradation	Metabolism	Amino acid metabolism	3	0	3	18	0.777569	1	Csa_7G448900,Csa_1G173130,Csa_1G598330	-	http://www.kegg.jp/kegg-bin/show_pathway?map00310/K14085%09%23FFFFFF,red/K00626%09%23FFFFFF,red/K14157%09%23FFFFFF,red/
csv03410	Base excision repair	Genetic Information Processing	Replication and repair	2	2	4	24	0.7913	1	Csa_6G152930,Csa_6G502690	Csa_4G309150,Csa_6G134890	http://www.kegg.jp/kegg-bin/show_pathway?map03410/K10798%09%23FFFFFF,red/K10802%09%23FFFFFF,green/K01246%09%23FFFFFF,green/K01247%09%23FFFFFF,red/
csv00300	Lysine biosynthesis	Metabolism	Amino acid metabolism	1	0	1	7	0.816587	1	Csa_2G404730	-	http://www.kegg.jp/kegg-bin/show_pathway?map00300/K10206%09%23FFFFFF,red/
csv00790	Folate biosynthesis	Metabolism	Metabolism of cofactors and vitamins	2	1	3	20	0.836939	1	Csa_4G626100,Csa_4G629460	Csa_6G029440	http://www.kegg.jp/kegg-bin/show_pathway?map00790/K01307%09%23FFFFFF,red/K18482%09%23FFFFFF,red/K14652%09%23FFFFFF,green/
csv00561	Glycerolipid metabolism	Metabolism	Lipid metabolism	5	2	7	44	0.864497	1	Csa_7G448900,Csa_2G000370,Csa_6G324840,Csa_7G253210,Csa_3G730760	Csa_2G404960,Csa_6G004540	http://www.kegg.jp/kegg-bin/show_pathway?map00561/K11155%09%23FFFFFF,red/K13508%09%23FFFFFF,green/K14085%09%23FFFFFF,red/K00002%09%23FFFFFF,red/K18693%09%23FFFFFF,green/K21362%09%23FFFFFF,red/K13513%09%23FFFFFF,red/
csv04141	Protein processing in endoplasmic reticulum	Genetic Information Processing	Folding, sorting and degradation	22	2	24	138	0.905057	1	Csa_3G020080,Csa_4G005000,Csa_2G070310,Csa_5G190530,Csa_7G072770,Csa_2G238800,Csa_2G403150,Csa_7G012950,Csa_4G617390,Csa_2G033940,Csa_5G139050,Csa_6G168250,Csa_5G138480,Csa_5G198120,Csa_4G303700,Csa_2G368880,Csa_6G514900,Csa_6G445030,Csa_5G514500,Csa_5G190560,Csa_6G128040,Csa_6G383520	Csa_6G517320,Csa_1G063560	http://www.kegg.jp/kegg-bin/show_pathway?map04141/K09487%09%23FFFFFF,red/K10666%09%23FFFFFF,purple/K09486%09%23FFFFFF,red/K09584%09%23FFFFFF,red/K13993%09%23FFFFFF,purple/K12669%09%23FFFFFF,red/K03283%09%23FFFFFF,red/K14015%09%23FFFFFF,red/K08057%09%23FFFFFF,red/K09523%09%23FFFFFF,red/K09580%09%23FFFFFF,red/K12670%09%23FFFFFF,red/K03094%09%23FFFFFF,red/
csv00340	Histidine metabolism	Metabolism	Amino acid metabolism	1	0	1	10	0.911398	1	Csa_7G448900	-	http://www.kegg.jp/kegg-bin/show_pathway?map00340/K14085%09%23FFFFFF,red/
csv03030	DNA replication	Genetic Information Processing	Replication and repair	4	0	4	31	0.925354	1	Csa_3G127240,Csa_6G502800,Csa_4G629450,Csa_5G614640	-	http://www.kegg.jp/kegg-bin/show_pathway?map03030/K07466%09%23FFFFFF,red/K10742%09%23FFFFFF,red/K10740%09%23FFFFFF,red/K10756%09%23FFFFFF,red/
csv00230	Purine metabolism	Metabolism	Nucleotide metabolism	8	3	11	72	0.929833	1	Csa_3G142980,Csa_3G110660,Csa_2G215520,Csa_1G057010,Csa_3G147210,Csa_6G486750,Csa_3G144230,Csa_7G239630	Csa_2G381870,Csa_5G153080,Csa_2G008770	http://www.kegg.jp/kegg-bin/show_pathway?map00230/K01945%09%23FFFFFF,red/K10807%09%23FFFFFF,red/K00088%09%23FFFFFF,red/K00939%09%23FFFFFF,green/K01951%09%23FFFFFF,green/K00759%09%23FFFFFF,green/K03787%09%23FFFFFF,red/K13811%09%23FFFFFF,red/K00602%09%23FFFFFF,red/K18151%09%23FFFFFF,red/
csv00590	Arachidonic acid metabolism	Metabolism	Lipid metabolism	1	0	1	11	0.930486	1	Csa_1G433610	-	http://www.kegg.jp/kegg-bin/show_pathway?map00590/K01047%09%23FFFFFF,red/
csv00740	Riboflavin metabolism	Metabolism	Metabolism of cofactors and vitamins	0	1	1	11	0.930486	1	-	Csa_6G029440	http://www.kegg.jp/kegg-bin/show_pathway?map00740/K14652%09%23FFFFFF,green/
csv03440	Homologous recombination	Genetic Information Processing	Replication and repair	5	0	5	38	0.934693	1	Csa_6G358050,Csa_4G629450,Csa_5G614640,Csa_2G033360,Csa_6G486820	-	http://www.kegg.jp/kegg-bin/show_pathway?map03440/K07466%09%23FFFFFF,red/K10901%09%23FFFFFF,red/K10740%09%23FFFFFF,red/K10882%09%23FFFFFF,red/K10881%09%23FFFFFF,red/
csv04070	Phosphatidylinositol signaling system	Environmental Information Processing	Signal transduction	5	0	5	38	0.934693	1	Csa_3G824810,Csa_2G439240,Csa_6G491620,Csa_1G531190,Csa_2G348290	-	http://www.kegg.jp/kegg-bin/show_pathway?map04070/K05857%09%23FFFFFF,red/K01110%09%23FFFFFF,red/K00913%09%23FFFFFF,red/K00914%09%23FFFFFF,red/
csv00510	N-Glycan biosynthesis	Metabolism	Glycan biosynthesis and metabolism	3	0	3	26	0.940439	1	Csa_2G238800,Csa_3G008860,Csa_6G514900	-	http://www.kegg.jp/kegg-bin/show_pathway?map00510/K09658%09%23FFFFFF,red/K12670%09%23FFFFFF,red/K12669%09%23FFFFFF,red/
csv03420	Nucleotide excision repair	Genetic Information Processing	Replication and repair	5	0	5	39	0.943685	1	Csa_6G120930,Csa_6G185330,Csa_6G502800,Csa_4G629450,Csa_5G614640	-	http://www.kegg.jp/kegg-bin/show_pathway?map03420/K07466%09%23FFFFFF,red/K10140%09%23FFFFFF,red/K10840%09%23FFFFFF,red/K10740%09%23FFFFFF,red/K10756%09%23FFFFFF,red/
csv03018	RNA degradation	Genetic Information Processing	Folding, sorting and degradation	6	3	9	64	0.952426	1	Csa_1G014400,Csa_7G041980,Csa_6G450370,Csa_1G599450,Csa_4G097630,Csa_1G181360	Csa_2G382610,Csa_5G611030,Csa_6G095890	http://www.kegg.jp/kegg-bin/show_pathway?map03018/K13126%09%23FFFFFF,green/K04077%09%23FFFFFF,red/K12581%09%23FFFFFF,green/K12606%09%23FFFFFF,red/K00850%09%23FFFFFF,red/K01689%09%23FFFFFF,red/K12608%09%23FFFFFF,red/K14442%09%23FFFFFF,green/
csv04130	SNARE interactions in vesicular transport	Genetic Information Processing	Folding, sorting and degradation	2	1	3	30	0.97099	1	Csa_3G182070,Csa_4G192200	Csa_3G782680	http://www.kegg.jp/kegg-bin/show_pathway?map04130/K08486%09%23FFFFFF,purple/K08517%09%23FFFFFF,red/
csv00563	Glycosylphosphatidylinositol (GPI)-anchor biosynthesis	Metabolism	Glycan biosynthesis and metabolism	1	0	1	18	0.987298	1	Csa_3G008860	-	http://www.kegg.jp/kegg-bin/show_pathway?map00563/K09658%09%23FFFFFF,red/
csv04144	Endocytosis	Cellular Processes	Transport and catabolism	11	4	15	110	0.987569	1	Csa_7G446760,Csa_2G070310,Csa_3G134940,Csa_1G469730,Csa_2G000620,Csa_3G837640,Csa_5G514500,Csa_2G381740,Csa_6G032470,Csa_6G008830,Csa_2G032750	Csa_3G698470,Csa_6G491660,Csa_2G297190,Csa_6G128620	http://www.kegg.jp/kegg-bin/show_pathway?map04144/K12471%09%23FFFFFF,red/K07904%09%23FFFFFF,purple/K03283%09%23FFFFFF,red/K07937%09%23FFFFFF,purple/K19476%09%23FFFFFF,purple/K01115%09%23FFFFFF,red/K07897%09%23FFFFFF,green/K12194%09%23FFFFFF,red/
csv04136	Autophagy - other	Cellular Processes	Transport and catabolism	2	0	2	27	0.987988	1	Csa_6G513730,Csa_2G348290	-	http://www.kegg.jp/kegg-bin/show_pathway?map04136/K08341%09%23FFFFFF,red/K00914%09%23FFFFFF,red/
csv03060	Protein export	Genetic Information Processing	Folding, sorting and degradation	1	1	2	29	0.992133	1	Csa_2G006150	Csa_6G452680	http://www.kegg.jp/kegg-bin/show_pathway?map03060/K13280%09%23FFFFFF,red/K03106%09%23FFFFFF,green/
csv00190	Oxidative phosphorylation	Metabolism	Energy metabolism	2	6	8	74	0.99494	1	Csa_2G364570,Csa_2G033950	Csa_6G016970,Csa_4G293860,Csa_3G878880,Csa_1G062930,Csa_2G381850,Csa_6G095940	http://www.kegg.jp/kegg-bin/show_pathway?map00190/K03661%09%23FFFFFF,green/K01507%09%23FFFFFF,purple/K02113%09%23FFFFFF,green/K02109%09%23FFFFFF,green/K02115%09%23FFFFFF,green/K02154%09%23FFFFFF,red/
csv03022	Basal transcription factors	Genetic Information Processing	Transcription	0	2	2	32	0.995861	1	-	Csa_4G415910,Csa_6G452070	http://www.kegg.jp/kegg-bin/show_pathway?map03022/K03124%09%23FFFFFF,green/K03126%09%23FFFFFF,green/
csv00970	Aminoacyl-tRNA biosynthesis	Genetic Information Processing	Translation	1	1	2	36	0.998262	1	Csa_7G368100	Csa_4G000540	http://www.kegg.jp/kegg-bin/show_pathway?map00970/K01876%09%23FFFFFF,green/K01893%09%23FFFFFF,red/
csv03020	RNA polymerase	Genetic Information Processing	Transcription	1	0	1	30	0.999315	1	Csa_1G702030	-	http://www.kegg.jp/kegg-bin/show_pathway?map03020/K03013%09%23FFFFFF,red/
csv03015	mRNA surveillance pathway	Genetic Information Processing	Translation	4	2	6	74	0.99949	1	Csa_2G271430,Csa_3G727950,Csa_3G124880,Csa_2G000310	Csa_6G095890,Csa_6G447070	http://www.kegg.jp/kegg-bin/show_pathway?map03015/K14397%09%23FFFFFF,red/K13126%09%23FFFFFF,green/K06269%09%23FFFFFF,red/K14324%09%23FFFFFF,red/K11584%09%23FFFFFF,purple/
csv03008	Ribosome biogenesis in eukaryotes	Genetic Information Processing	Translation	1	0	1	54	0.999998	1	Csa_1G573700	-	http://www.kegg.jp/kegg-bin/show_pathway?map03008/K14521%09%23FFFFFF,red/
csv03013	RNA transport	Genetic Information Processing	Translation	2	1	3	100	1	1	Csa_7G037660,Csa_3G124880	Csa_6G095890	http://www.kegg.jp/kegg-bin/show_pathway?map03013/K13126%09%23FFFFFF,green/K14324%09%23FFFFFF,red/K03236%09%23FFFFFF,red/
csv03040	Spliceosome	Genetic Information Processing	Transcription	3	0	3	114	1	1	Csa_1G145960,Csa_2G070310,Csa_5G514500	-	http://www.kegg.jp/kegg-bin/show_pathway?map03040/K03283%09%23FFFFFF,red/K12836%09%23FFFFFF,red/
csv03010	Ribosome	Genetic Information Processing	Translation	0	2	2	200	1	1	-	Csa_5G524750,Csa_6G519510	http://www.kegg.jp/kegg-bin/show_pathway?map03010/K02935%09%23FFFFFF,green/K02914%09%23FFFFFF,green/

## Sheet: H2S vs S
Table S3 KEGG pathway analysis of DEGs at transcriptome levels in H2S vs S (continued).
PathwayID	Pathway	Level1	Level2	Up_number	Down_number	DEG_number	total_number	Pvalue	FDR	Up_gene	Down_gene	URL
csv00940	Phenylpropanoid biosynthesis	Metabolism	Biosynthesis of other secondary metabolites	2	24	26	94	1.5422e-08	1.35714e-06	Csa_2G300950,Csa_4G443110	Csa_6G445770,Csa_4G285740,Csa_5G167220,Csa_6G445750,Csa_2G406630,Csa_7G430240,Csa_3G904120,Csa_6G490230,Csa_4G285750,Csa_3G716870,Csa_7G430250,Csa_6G504560,Csa_6G445010,Csa_6G495000,Csa_4G091880,Csa_4G008770,Csa_4G008780,Csa_1G586250,Csa_3G874320,Csa_6G213910,Csa_7G049140,Csa_6G445760,Csa_5G262770,Csa_6G446290	http://www.kegg.jp/kegg-bin/show_pathway?map00940/K09753%09%23FFFFFF,green/K13066%09%23FFFFFF,green/K00430%09%23FFFFFF,purple/K10775%09%23FFFFFF,green/K00083%09%23FFFFFF,purple/K01904%09%23FFFFFF,green/
csv00592	alpha-Linolenic acid metabolism	Metabolism	Lipid metabolism	2	8	10	27	2.87834e-05	0.00105468	Csa_7G322060,Csa_7G075600	Csa_7G449420,Csa_3G133140,Csa_5G098480,Csa_5G366670,Csa_3G859730,Csa_3G829270,Csa_2G360780,Csa_3G002690	http://www.kegg.jp/kegg-bin/show_pathway?map00592/K01723%09%23FFFFFF,purple/K05894%09%23FFFFFF,green/K10529%09%23FFFFFF,green/K10525%09%23FFFFFF,green/K18857%09%23FFFFFF,red/K08241%09%23FFFFFF,green/K07513%09%23FFFFFF,green/K00454%09%23FFFFFF,green/
csv00195	Photosynthesis	Metabolism	Energy metabolism	11	0	11	33	3.5955e-05	0.00105468	Csa_3G875430,Csa_1G714680,Csa_6G483300,Csa_6G525340,Csa_3G414060,Csa_1G168350,Csa_6G016970,Csa_7G378440,Csa_3G060980,Csa_2G074240,Csa_3G147780	-	http://www.kegg.jp/kegg-bin/show_pathway?map00195/K02638%09%23FFFFFF,red/K08901%09%23FFFFFF,red/K02692%09%23FFFFFF,red/K02698%09%23FFFFFF,red/K08905%09%23FFFFFF,red/K02694%09%23FFFFFF,red/K02721%09%23FFFFFF,red/K02699%09%23FFFFFF,red/K02701%09%23FFFFFF,red/K02113%09%23FFFFFF,red/K14332%09%23FFFFFF,red/
csv00480	Glutathione metabolism	Metabolism	Metabolism of other amino acids	1	14	15	59	5.38048e-05	0.00118371	Csa_3G889840	Csa_4G064650,Csa_1G033120,Csa_4G303690,Csa_4G304760,Csa_1G479610,Csa_4G303680,Csa_4G304240,Csa_1G033130,Csa_4G304250,Csa_4G303170,Csa_7G395820,Csa_1G033160,Csa_1G033140,Csa_6G507100	http://www.kegg.jp/kegg-bin/show_pathway?map00480/K00799%09%23FFFFFF,green/K00434%09%23FFFFFF,purple/
csv00360	Phenylalanine metabolism	Metabolism	Amino acid metabolism	2	10	12	42	8.87335e-05	0.00156171	Csa_6G423470,Csa_6G423980	Csa_6G445770,Csa_7G430240,Csa_3G889160,Csa_4G008770,Csa_4G008780,Csa_4G629470,Csa_6G446290,Csa_6G445750,Csa_7G430250,Csa_6G445760	http://www.kegg.jp/kegg-bin/show_pathway?map00360/K00276%09%23FFFFFF,red/K10775%09%23FFFFFF,green/K14454%09%23FFFFFF,green/K01904%09%23FFFFFF,green/K00815%09%23FFFFFF,green/
csv00196	Photosynthesis - antenna proteins	Metabolism	Energy metabolism	7	0	7	17	0.000220934	0.00324037	Csa_5G490820,Csa_5G646700,Csa_4G308550,Csa_1G630330,Csa_1G009810,Csa_3G099680,Csa_5G589390	-	http://www.kegg.jp/kegg-bin/show_pathway?map00196/K08914%09%23FFFFFF,red/K08908%09%23FFFFFF,red/K08916%09%23FFFFFF,red/K08910%09%23FFFFFF,red/K08907%09%23FFFFFF,red/K08909%09%23FFFFFF,red/K08915%09%23FFFFFF,red/
csv04626	Plant-pathogen interaction	Organismal Systems	Environmental adaptation	2	17	19	99	0.000341521	0.00429341	Csa_4G011740,Csa_6G439940	Csa_7G070253,Csa_3G835850,Csa_3G829040,Csa_3G588520,Csa_7G070254,Csa_3G782840,Csa_3G854250,Csa_4G172540,Csa_3G727960,Csa_6G522700,Csa_2G406780,Csa_1G025960,Csa_6G505910,Csa_3G845500,Csa_7G343300,Csa_3G144210,Csa_2G000780	http://www.kegg.jp/kegg-bin/show_pathway?map04626/K13448%09%23FFFFFF,green/K05391%09%23FFFFFF,green/K13447%09%23FFFFFF,green/K13424%09%23FFFFFF,green/K04368%09%23FFFFFF,green/K13449%09%23FFFFFF,green/K13456%09%23FFFFFF,green/K13412%09%23FFFFFF,purple/K13420%09%23FFFFFF,green/
csv04075	Plant hormone signal transduction	Environmental Information Processing	Signal transduction	14	18	32	213	0.000490637	0.005397	Csa_1G524760,Csa_2G200420,Csa_6G137590,Csa_1G042920,Csa_3G878200,Csa_2G011420,Csa_7G008440,Csa_2G006790,Csa_3G730890,Csa_7G238400,Csa_6G092560,Csa_7G378530,Csa_7G447060,Csa_2G258640	Csa_7G070253,Csa_6G493310,Csa_6G125240,Csa_5G374730,Csa_7G070254,Csa_6G492310,Csa_5G603910,Csa_2G381760,Csa_4G641660,Csa_6G091930,Csa_2G355020,Csa_2G200440,Csa_2G177210,Csa_2G258730,Csa_1G422470,Csa_1G422990,Csa_7G375820,Csa_3G516540	http://www.kegg.jp/kegg-bin/show_pathway?map04075/K13464%09%23FFFFFF,purple/K14505%09%23FFFFFF,green/K13946%09%23FFFFFF,green/K14487%09%23FFFFFF,green/K14495%09%23FFFFFF,green/K14516%09%23FFFFFF,green/K14504%09%23FFFFFF,green/K13449%09%23FFFFFF,green/K14497%09%23FFFFFF,red/K14515%09%23FFFFFF,purple/K14488%09%23FFFFFF,purple/K14496%09%23FFFFFF,red/K14484%09%23FFFFFF,purple/K14492%09%23FFFFFF,green/
csv04016	MAPK signaling pathway - plant	Environmental Information Processing	Signal transduction	6	11	17	98	0.0022254	0.0217595	Csa_1G524760,Csa_7G047370,Csa_3G878200,Csa_1G042980,Csa_2G006790,Csa_3G730890	Csa_7G070253,Csa_1G479630,Csa_7G070254,Csa_2G381760,Csa_6G522700,Csa_2G177210,Csa_1G025960,Csa_3G845500,Csa_6G507520,Csa_7G375820,Csa_2G416770	http://www.kegg.jp/kegg-bin/show_pathway?map04016/K13447%09%23FFFFFF,green/K20604%09%23FFFFFF,red/K20536%09%23FFFFFF,green/K13424%09%23FFFFFF,green/K20547%09%23FFFFFF,green/K20716%09%23FFFFFF,green/K14516%09%23FFFFFF,green/K13449%09%23FFFFFF,green/K14497%09%23FFFFFF,red/K14515%09%23FFFFFF,purple/K14496%09%23FFFFFF,red/K20729%09%23FFFFFF,red/K13420%09%23FFFFFF,green/
csv00950	Isoquinoline alkaloid biosynthesis	Metabolism	Biosynthesis of other secondary metabolites	2	3	5	15	0.00540035	0.0475231	Csa_6G423470,Csa_6G423980	Csa_3G889160,Csa_4G629470,Csa_1G073640	http://www.kegg.jp/kegg-bin/show_pathway?map00950/K00276%09%23FFFFFF,red/K14454%09%23FFFFFF,green/K00815%09%23FFFFFF,green/K00422%09%23FFFFFF,green/
csv00904	Diterpenoid biosynthesis	Metabolism	Metabolism of terpenoids and polyketides	4	0	4	10	0.00623343	0.0498674	Csa_5G172270,Csa_3G903550,Csa_4G638410,Csa_3G903540	-	http://www.kegg.jp/kegg-bin/show_pathway?map00904/K05282%09%23FFFFFF,red/K04123%09%23FFFFFF,red/K04122%09%23FFFFFF,red/
csv00350	Tyrosine metabolism	Metabolism	Amino acid metabolism	3	4	7	31	0.0109461	0.0802714	Csa_6G423470,Csa_7G322060,Csa_6G423980	Csa_3G889160,Csa_1G044860,Csa_4G629470,Csa_1G073640	http://www.kegg.jp/kegg-bin/show_pathway?map00350/K00276%09%23FFFFFF,red/K18857%09%23FFFFFF,red/K14454%09%23FFFFFF,green/K00001%09%23FFFFFF,green/K00815%09%23FFFFFF,green/K00422%09%23FFFFFF,green/
csv00053	Ascorbate and aldarate metabolism	Metabolism	Carbohydrate metabolism	2	4	6	30	0.0318591	0.214052	Csa_3G889840,Csa_1G604040	Csa_1G479610,Csa_1G575130,Csa_3G099720,Csa_6G507100	http://www.kegg.jp/kegg-bin/show_pathway?map00053/K00434%09%23FFFFFF,purple/K08232%09%23FFFFFF,green/K00469%09%23FFFFFF,green/K00423%09%23FFFFFF,red/
csv00960	Tropane, piperidine and pyridine alkaloid biosynthesis	Metabolism	Biosynthesis of other secondary metabolites	2	2	4	16	0.0364862	0.214052	Csa_6G423980,Csa_6G423470	Csa_4G629470,Csa_3G889160	http://www.kegg.jp/kegg-bin/show_pathway?map00960/K00276%09%23FFFFFF,red/K14454%09%23FFFFFF,green/K00815%09%23FFFFFF,green/
csv00073	Cutin, suberine and wax biosynthesis	Metabolism	Lipid metabolism	1	3	4	16	0.0364862	0.214052	Csa_6G152310	Csa_5G153010,Csa_1G001360,Csa_1G528600	http://www.kegg.jp/kegg-bin/show_pathway?map00073/K15398%09%23FFFFFF,green/K15400%09%23FFFFFF,green/K13356%09%23FFFFFF,red/K15401%09%23FFFFFF,green/
csv00565	Ether lipid metabolism	Metabolism	Lipid metabolism	1	3	4	18	0.0539175	0.296546	Csa_1G629050	Csa_2G381740,Csa_3G038190,Csa_2G032750	http://www.kegg.jp/kegg-bin/show_pathway?map00565/K01115%09%23FFFFFF,green/K01114%09%23FFFFFF,red/
csv01502	Vancomycin resistance	Human Diseases	Drug resistance: Antimicrobial	0	1	1	1	0.0818166	0.369789	-	Csa_1G448950	http://www.kegg.jp/kegg-bin/show_pathway?map01502/K01000%09%23FFFFFF,green/
csv00601	Glycosphingolipid biosynthesis - lacto and neolacto series	Metabolism	Glycan biosynthesis and metabolism	0	1	1	1	0.0818166	0.369789	-	Csa_3G731870	http://www.kegg.jp/kegg-bin/show_pathway?map00601/K01988%09%23FFFFFF,green/
csv00130	Ubiquinone and other terpenoid-quinone biosynthesis	Metabolism	Metabolism of cofactors and vitamins	0	5	5	29	0.0832648	0.369789	-	Csa_2G059830,Csa_7G430240,Csa_4G629470,Csa_3G081930,Csa_7G430250	http://www.kegg.jp/kegg-bin/show_pathway?map00130/K03809%09%23FFFFFF,green/K09833%09%23FFFFFF,green/K01904%09%23FFFFFF,green/K00815%09%23FFFFFF,green/
csv02010	ABC transporters	Environmental Information Processing	Membrane transport	2	1	3	13	0.0840429	0.369789	Csa_7G396440,Csa_5G633170	Csa_2G074190	http://www.kegg.jp/kegg-bin/show_pathway?map02010/K05666%09%23FFFFFF,red/K05658%09%23FFFFFF,purple/
csv00520	Amino sugar and nucleotide sugar metabolism	Metabolism	Carbohydrate metabolism	0	12	12	98	0.102026	0.426168	-	Csa_7G352420,Csa_6G510320,Csa_5G139760,Csa_1G015690,Csa_5G139730,Csa_3G120500,Csa_4G002510,Csa_1G267220,Csa_1G534750,Csa_1G039880,Csa_5G139770,Csa_6G507520	http://www.kegg.jp/kegg-bin/show_pathway?map00520/K13379%09%23FFFFFF,green/K13648%09%23FFFFFF,green/K20547%09%23FFFFFF,green/K01183%09%23FFFFFF,green/K00770%09%23FFFFFF,green/
csv00905	Brassinosteroid biosynthesis	Metabolism	Metabolism of terpenoids and polyketides	2	0	2	7	0.106542	0.426168	Csa_2G006030,Csa_1G305710	-	http://www.kegg.jp/kegg-bin/show_pathway?map00905/K15639%09%23FFFFFF,red/
csv04144	Endocytosis	Cellular Processes	Transport and catabolism	1	12	13	110	0.112659	0.431042	Csa_3G902260	Csa_3G134940,Csa_3G271380,Csa_2G270210,Csa_2G004740,Csa_5G514500,Csa_2G381740,Csa_6G032470,Csa_3G038190,Csa_1G580230,Csa_6G008830,Csa_6G517060,Csa_2G032750	http://www.kegg.jp/kegg-bin/show_pathway?map04144/K12471%09%23FFFFFF,green/K12493%09%23FFFFFF,red/K07904%09%23FFFFFF,green/K12184%09%23FFFFFF,green/K03283%09%23FFFFFF,green/K19476%09%23FFFFFF,green/K01115%09%23FFFFFF,green/K18443%09%23FFFFFF,green/K19366%09%23FFFFFF,green/
csv00430	Taurine and hypotaurine metabolism	Metabolism	Metabolism of other amino acids	1	1	2	8	0.134617	0.483816	Csa_3G827270	Csa_5G106010	http://www.kegg.jp/kegg-bin/show_pathway?map00430/K01580%09%23FFFFFF,green/K10712%09%23FFFFFF,red/
csv00260	Glycine, serine and threonine metabolism	Metabolism	Amino acid metabolism	4	4	8	63	0.139904	0.483816	Csa_6G423470,Csa_2G351700,Csa_3G903520,Csa_6G423980	Csa_6G448730,Csa_3G730200,Csa_2G308370,Csa_6G448740	http://www.kegg.jp/kegg-bin/show_pathway?map00260/K00827%09%23FFFFFF,green/K00276%09%23FFFFFF,red/K02437%09%23FFFFFF,red/K01754%09%23FFFFFF,green/K00281%09%23FFFFFF,red/K01834%09%23FFFFFF,green/
csv00906	Carotenoid biosynthesis	Metabolism	Metabolism of terpenoids and polyketides	2	2	4	25	0.142946	0.483816	Csa_2G226860,Csa_6G523440	Csa_4G056600,Csa_5G152820	http://www.kegg.jp/kegg-bin/show_pathway?map00906/K09843%09%23FFFFFF,green/K09840%09%23FFFFFF,red/K15746%09%23FFFFFF,green/K17911%09%23FFFFFF,red/
csv00909	Sesquiterpenoid and triterpenoid biosynthesis	Metabolism	Metabolism of terpenoids and polyketides	1	1	2	9	0.164084	0.534794	Csa_3G097540	Csa_3G039850	http://www.kegg.jp/kegg-bin/show_pathway?map00909/K15803%09%23FFFFFF,purple/
csv00910	Nitrogen metabolism	Metabolism	Energy metabolism	2	2	4	27	0.175069	0.550216	Csa_1G120470,Csa_3G836520	Csa_4G025140,Csa_4G377160	http://www.kegg.jp/kegg-bin/show_pathway?map00910/K00261%09%23FFFFFF,green/K10534%09%23FFFFFF,green/K01674%09%23FFFFFF,red/K01673%09%23FFFFFF,red/
csv00564	Glycerophospholipid metabolism	Metabolism	Lipid metabolism	1	6	7	59	0.204791	0.621434	Csa_1G629050	Csa_3G099600,Csa_2G381740,Csa_3G038190,Csa_5G457740,Csa_7G412840,Csa_2G032750	http://www.kegg.jp/kegg-bin/show_pathway?map00564/K13508%09%23FFFFFF,green/K00006%09%23FFFFFF,green/K01115%09%23FFFFFF,green/K00901%09%23FFFFFF,green/K01114%09%23FFFFFF,red/
csv00591	Linoleic acid metabolism	Metabolism	Lipid metabolism	0	1	1	3	0.225952	0.644928	-	Csa_7G449420	http://www.kegg.jp/kegg-bin/show_pathway?map00591/K00454%09%23FFFFFF,green/
csv04130	SNARE interactions in vesicular transport	Genetic Information Processing	Folding, sorting and degradation	0	4	4	30	0.227191	0.644928	-	Csa_6G502760,Csa_2G420980,Csa_1G226450,Csa_3G782680	http://www.kegg.jp/kegg-bin/show_pathway?map04130/K08486%09%23FFFFFF,green/K08515%09%23FFFFFF,green/
csv00710	Carbon fixation in photosynthetic organisms	Metabolism	Energy metabolism	2	4	6	52	0.249674	0.666197	Csa_2G011530,Csa_5G571460	Csa_6G497180,Csa_3G889160,Csa_5G611700,Csa_7G448000	http://www.kegg.jp/kegg-bin/show_pathway?map00710/K14454%09%23FFFFFF,green/K00814%09%23FFFFFF,green/K01807%09%23FFFFFF,purple/K01610%09%23FFFFFF,green/
csv00902	Monoterpenoid biosynthesis	Metabolism	Metabolism of terpenoids and polyketides	1	1	2	12	0.256985	0.666197	Csa_4G303180	Csa_7G059660	http://www.kegg.jp/kegg-bin/show_pathway?map00902/K21373%09%23FFFFFF,red/K21374%09%23FFFFFF,green/
csv00330	Arginine and proline metabolism	Metabolism	Amino acid metabolism	3	2	5	42	0.257394	0.666197	Csa_6G062290,Csa_3G733920,Csa_3G150200	Csa_2G036680,Csa_3G889160	http://www.kegg.jp/kegg-bin/show_pathway?map00330/K12657%09%23FFFFFF,red/K01611%09%23FFFFFF,purple/K14454%09%23FFFFFF,green/
csv00071	Fatty acid degradation	Metabolism	Lipid metabolism	1	3	4	33	0.282606	0.669994	Csa_7G322060	Csa_3G133140,Csa_1G044860,Csa_1G528600	http://www.kegg.jp/kegg-bin/show_pathway?map00071/K18857%09%23FFFFFF,red/K07513%09%23FFFFFF,green/K00001%09%23FFFFFF,green/K15401%09%23FFFFFF,green/
csv00290	Valine, leucine and isoleucine biosynthesis	Metabolism	Amino acid metabolism	0	2	2	13	0.288429	0.669994	-	Csa_6G448730,Csa_6G448740	http://www.kegg.jp/kegg-bin/show_pathway?map00290/K01754%09%23FFFFFF,green/
csv00603	Glycosphingolipid biosynthesis - globo and isoglobo series	Metabolism	Glycan biosynthesis and metabolism	0	1	1	4	0.289316	0.669994	-	Csa_3G731870	http://www.kegg.jp/kegg-bin/show_pathway?map00603/K01988%09%23FFFFFF,green/
csv00943	Isoflavonoid biosynthesis	Metabolism	Biosynthesis of other secondary metabolites	1	0	1	4	0.289316	0.669994	Csa_6G492220	-	http://www.kegg.jp/kegg-bin/show_pathway?map00943/K13260%09%23FFFFFF,red/
csv00860	Porphyrin and chlorophyll metabolism	Metabolism	Metabolism of cofactors and vitamins	2	2	4	35	0.320607	0.709925	Csa_3G151460,Csa_5G470560	Csa_2G351800,Csa_1G250130	http://www.kegg.jp/kegg-bin/show_pathway?map00860/K13606%09%23FFFFFF,green/K19073%09%23FFFFFF,red/K01772%09%23FFFFFF,green/K08099%09%23FFFFFF,red/
csv00250	Alanine, aspartate and glutamate metabolism	Metabolism	Amino acid metabolism	0	5	5	46	0.322693	0.709925	-	Csa_3G889160,Csa_3G730200,Csa_5G106010,Csa_4G025140,Csa_7G448000	http://www.kegg.jp/kegg-bin/show_pathway?map00250/K00827%09%23FFFFFF,green/K14454%09%23FFFFFF,green/K01580%09%23FFFFFF,green/K00261%09%23FFFFFF,green/K00814%09%23FFFFFF,green/
csv00270	Cysteine and methionine metabolism	Metabolism	Amino acid metabolism	2	4	6	58	0.337094	0.723519	Csa_6G062290,Csa_3G150200	Csa_2G036680,Csa_3G889160,Csa_3G730200,Csa_4G629470	http://www.kegg.jp/kegg-bin/show_pathway?map00270/K00827%09%23FFFFFF,green/K01611%09%23FFFFFF,purple/K14454%09%23FFFFFF,green/K00815%09%23FFFFFF,green/
csv00040	Pentose and glucuronate interconversions	Metabolism	Carbohydrate metabolism	2	5	7	70	0.347595	0.728295	Csa_3G646640,Csa_4G043950	Csa_1G597780,Csa_3G164510,Csa_3G126810,Csa_7G405820,Csa_3G730760	http://www.kegg.jp/kegg-bin/show_pathway?map00040/K00002%09%23FFFFFF,green/K01051%09%23FFFFFF,purple/
csv00400	Phenylalanine, tyrosine and tryptophan biosynthesis	Metabolism	Amino acid metabolism	0	4	4	39	0.397255	0.812986	-	Csa_3G889160,Csa_5G638330,Csa_4G629470,Csa_6G499800	http://www.kegg.jp/kegg-bin/show_pathway?map00400/K01850%09%23FFFFFF,green/K14454%09%23FFFFFF,green/K00815%09%23FFFFFF,green/K01626%09%23FFFFFF,green/
csv00410	beta-Alanine metabolism	Metabolism	Metabolism of other amino acids	2	1	3	29	0.427464	0.854927	Csa_6G423470,Csa_6G423980	Csa_5G106010	http://www.kegg.jp/kegg-bin/show_pathway?map00410/K00276%09%23FFFFFF,red/K01580%09%23FFFFFF,green/
csv00730	Thiamine metabolism	Metabolism	Metabolism of cofactors and vitamins	2	0	2	18	0.440001	0.860446	Csa_3G078800,Csa_1G528590	-	http://www.kegg.jp/kegg-bin/show_pathway?map00730/K03146%09%23FFFFFF,red/K03147%09%23FFFFFF,red/
csv00300	Lysine biosynthesis	Metabolism	Amino acid metabolism	0	1	1	7	0.45	0.86087	-	Csa_2G404730	http://www.kegg.jp/kegg-bin/show_pathway?map00300/K10206%09%23FFFFFF,green/
csv00030	Pentose phosphate pathway	Metabolism	Carbohydrate metabolism	3	1	4	43	0.472384	0.866036	Csa_3G904100,Csa_2G011530,Csa_5G571460	Csa_5G611700	http://www.kegg.jp/kegg-bin/show_pathway?map00030/K00948%09%23FFFFFF,red/K01807%09%23FFFFFF,purple/
csv00562	Inositol phosphate metabolism	Metabolism	Carbohydrate metabolism	1	3	4	43	0.472384	0.866036	Csa_1G629050	Csa_3G824810,Csa_2G372810,Csa_1G575130	http://www.kegg.jp/kegg-bin/show_pathway?map00562/K01110%09%23FFFFFF,green/K01114%09%23FFFFFF,red/K00913%09%23FFFFFF,green/K00469%09%23FFFFFF,green/
csv00561	Glycerolipid metabolism	Metabolism	Lipid metabolism	0	4	4	44	0.490651	0.872439	-	Csa_3G099600,Csa_5G365670,Csa_3G730760,Csa_7G412840	http://www.kegg.jp/kegg-bin/show_pathway?map00561/K00002%09%23FFFFFF,green/K13508%09%23FFFFFF,green/K00901%09%23FFFFFF,green/K01054%09%23FFFFFF,green/
csv00790	Folate biosynthesis	Metabolism	Metabolism of cofactors and vitamins	1	1	2	20	0.495704	0.872439	Csa_1G597180	Csa_4G629460	http://www.kegg.jp/kegg-bin/show_pathway?map00790/K18482%09%23FFFFFF,green/K01495%09%23FFFFFF,red/
csv00220	Arginine biosynthesis	Metabolism	Amino acid metabolism	0	3	3	35	0.554799	0.957301	-	Csa_4G025140,Csa_3G889160,Csa_7G448000	http://www.kegg.jp/kegg-bin/show_pathway?map00220/K14454%09%23FFFFFF,green/K00261%09%23FFFFFF,green/K00814%09%23FFFFFF,green/
csv00908	Zeatin biosynthesis	Metabolism	Metabolism of terpenoids and polyketides	1	0	1	11	0.609296	0.983741	Csa_4G415920	-	http://www.kegg.jp/kegg-bin/show_pathway?map00908/K13495%09%23FFFFFF,red/
csv00740	Riboflavin metabolism	Metabolism	Metabolism of cofactors and vitamins	0	1	1	11	0.609296	0.983741	-	Csa_5G548110	http://www.kegg.jp/kegg-bin/show_pathway?map00740/K14379%09%23FFFFFF,green/
csv04070	Phosphatidylinositol signaling system	Environmental Information Processing	Signal transduction	0	3	3	38	0.611801	0.983741	-	Csa_3G824810,Csa_3G099600,Csa_2G372810	http://www.kegg.jp/kegg-bin/show_pathway?map04070/K01110%09%23FFFFFF,green/K00901%09%23FFFFFF,green/K00913%09%23FFFFFF,green/
csv00460	Cyanoamino acid metabolism	Metabolism	Metabolism of other amino acids	1	1	2	25	0.618533	0.983741	Csa_2G055040	Csa_2G057070	http://www.kegg.jp/kegg-bin/show_pathway?map00460/K08248%09%23FFFFFF,purple/
csv00510	N-Glycan biosynthesis	Metabolism	Glycan biosynthesis and metabolism	1	1	2	26	0.640154	0.983741	Csa_5G522970	Csa_5G598080	http://www.kegg.jp/kegg-bin/show_pathway?map00510/K00737%09%23FFFFFF,purple/
csv00511	Other glycan degradation	Metabolism	Glycan biosynthesis and metabolism	1	0	1	12	0.641325	0.983741	Csa_5G146320	-	http://www.kegg.jp/kegg-bin/show_pathway?map00511/K01206%09%23FFFFFF,red/
csv00062	Fatty acid elongation	Metabolism	Lipid metabolism	0	2	2	27	0.660799	0.983741	-	Csa_1G418240,Csa_5G178710	http://www.kegg.jp/kegg-bin/show_pathway?map00062/K15397%09%23FFFFFF,green/
csv04146	Peroxisome	Cellular Processes	Transport and catabolism	1	3	4	55	0.669721	0.983741	Csa_6G152310	Csa_3G133140,Csa_7G047330,Csa_2G013250	http://www.kegg.jp/kegg-bin/show_pathway?map04146/K13348%09%23FFFFFF,green/K07513%09%23FFFFFF,green/K04565%09%23FFFFFF,green/K13356%09%23FFFFFF,red/
csv00750	Vitamin B6 metabolism	Metabolism	Metabolism of cofactors and vitamins	0	1	1	13	0.670733	0.983741	-	Csa_7G451920	http://www.kegg.jp/kegg-bin/show_pathway?map00750/K13248%09%23FFFFFF,green/
csv01040	Biosynthesis of unsaturated fatty acids	Metabolism	Lipid metabolism	0	1	1	15	0.722526	1	-	Csa_3G133140	http://www.kegg.jp/kegg-bin/show_pathway?map01040/K07513%09%23FFFFFF,green/
csv00650	Butanoate metabolism	Metabolism	Carbohydrate metabolism	0	1	1	15	0.722526	1	-	Csa_5G106010	http://www.kegg.jp/kegg-bin/show_pathway?map00650/K01580%09%23FFFFFF,green/
csv00500	Starch and sucrose metabolism	Metabolism	Carbohydrate metabolism	1	4	5	73	0.724339	1	Csa_3G017020	Csa_3G175690,Csa_6G520240,Csa_7G450770,Csa_1G005560	http://www.kegg.jp/kegg-bin/show_pathway?map00500/K16055%09%23FFFFFF,green/K01193%09%23FFFFFF,green/K01087%09%23FFFFFF,green/K01177%09%23FFFFFF,red/
csv00280	Valine, leucine and isoleucine degradation	Metabolism	Amino acid metabolism	0	2	2	33	0.76525	1	-	Csa_3G133140,Csa_3G730200	http://www.kegg.jp/kegg-bin/show_pathway?map00280/K00827%09%23FFFFFF,green/K07513%09%23FFFFFF,green/
csv00600	Sphingolipid metabolism	Metabolism	Lipid metabolism	0	1	1	17	0.766187	1	-	Csa_6G094720	http://www.kegg.jp/kegg-bin/show_pathway?map00600/K01634%09%23FFFFFF,green/
csv00010	Glycolysis / Gluconeogenesis	Metabolism	Carbohydrate metabolism	1	5	6	91	0.766302	1	Csa_7G322060	Csa_1G532350,Csa_6G497180,Csa_1G044860,Csa_2G308370,Csa_3G730760	http://www.kegg.jp/kegg-bin/show_pathway?map00010/K00002%09%23FFFFFF,green/K01568%09%23FFFFFF,green/K18857%09%23FFFFFF,red/K00001%09%23FFFFFF,green/K01610%09%23FFFFFF,green/K01834%09%23FFFFFF,green/
csv00900	Terpenoid backbone biosynthesis	Metabolism	Metabolism of terpenoids and polyketides	1	1	2	35	0.793286	1	Csa_7G029390	Csa_6G185830	http://www.kegg.jp/kegg-bin/show_pathway?map00900/K00021%09%23FFFFFF,red/K11778%09%23FFFFFF,green/
csv00052	Galactose metabolism	Metabolism	Carbohydrate metabolism	0	2	2	40	0.850807	1	-	Csa_5G601500,Csa_7G450770	http://www.kegg.jp/kegg-bin/show_pathway?map00052/K18819%09%23FFFFFF,green/K01193%09%23FFFFFF,green/
csv03410	Base excision repair	Genetic Information Processing	Replication and repair	0	1	1	24	0.871645	1	-	Csa_6G152930	http://www.kegg.jp/kegg-bin/show_pathway?map03410/K10798%09%23FFFFFF,green/
csv00061	Fatty acid biosynthesis	Metabolism	Lipid metabolism	0	1	1	28	0.908918	1	-	Csa_1G397120	http://www.kegg.jp/kegg-bin/show_pathway?map00061/K10781%09%23FFFFFF,green/
csv04712	Circadian rhythm - plant	Organismal Systems	Environmental adaptation	1	0	1	28	0.908918	1	Csa_5G021300	-	http://www.kegg.jp/kegg-bin/show_pathway?map04712/K12116%09%23FFFFFF,red/
csv03060	Protein export	Genetic Information Processing	Folding, sorting and degradation	0	1	1	29	0.916407	1	-	Csa_4G625570	http://www.kegg.jp/kegg-bin/show_pathway?map03060/K10956%09%23FFFFFF,green/
csv00630	Glyoxylate and dicarboxylate metabolism	Metabolism	Carbohydrate metabolism	2	0	2	54	0.942939	1	Csa_2G351700,Csa_3G903520	-	http://www.kegg.jp/kegg-bin/show_pathway?map00630/K02437%09%23FFFFFF,red/K00281%09%23FFFFFF,red/
csv00620	Pyruvate metabolism	Metabolism	Carbohydrate metabolism	0	2	2	54	0.942939	1	-	Csa_6G497180,Csa_3G076020	http://www.kegg.jp/kegg-bin/show_pathway?map00620/K01759%09%23FFFFFF,green/K01610%09%23FFFFFF,green/
csv00020	Citrate cycle (TCA cycle)	Metabolism	Carbohydrate metabolism	0	1	1	34	0.945581	1	-	Csa_6G497180	http://www.kegg.jp/kegg-bin/show_pathway?map00020/K01610%09%23FFFFFF,green/
csv00190	Oxidative phosphorylation	Metabolism	Energy metabolism	1	2	3	74	0.948612	1	Csa_6G016970	Csa_4G293860,Csa_2G033950	http://www.kegg.jp/kegg-bin/show_pathway?map00190/K01507%09%23FFFFFF,green/K02113%09%23FFFFFF,red/
csv00970	Aminoacyl-tRNA biosynthesis	Genetic Information Processing	Translation	0	1	1	36	0.954172	1	-	Csa_7G368100	http://www.kegg.jp/kegg-bin/show_pathway?map00970/K01893%09%23FFFFFF,green/
csv00240	Pyrimidine metabolism	Metabolism	Nucleotide metabolism	0	1	1	38	0.961409	1	-	Csa_7G370750	http://www.kegg.jp/kegg-bin/show_pathway?map00240/K16904%09%23FFFFFF,green/
csv03420	Nucleotide excision repair	Genetic Information Processing	Replication and repair	0	1	1	39	0.964587	1	-	Csa_6G120930	http://www.kegg.jp/kegg-bin/show_pathway?map03420/K10840%09%23FFFFFF,green/
csv03018	RNA degradation	Genetic Information Processing	Folding, sorting and degradation	0	2	2	64	0.97218	1	-	Csa_6G425790,Csa_2G270190	http://www.kegg.jp/kegg-bin/show_pathway?map03018/K12581%09%23FFFFFF,green/
csv04141	Protein processing in endoplasmic reticulum	Genetic Information Processing	Folding, sorting and degradation	1	5	6	138	0.974652	1	Csa_6G517320	Csa_2G360850,Csa_5G545560,Csa_4G625570,Csa_5G514500,Csa_5G515050	http://www.kegg.jp/kegg-bin/show_pathway?map04141/K03283%09%23FFFFFF,green/K10666%09%23FFFFFF,purple/K14011%09%23FFFFFF,green/K14009%09%23FFFFFF,green/K10956%09%23FFFFFF,green/
csv04120	Ubiquitin mediated proteolysis	Genetic Information Processing	Folding, sorting and degradation	1	1	2	70	0.982094	1	Csa_6G330470	Csa_5G517720	http://www.kegg.jp/kegg-bin/show_pathway?map04120/K10581%09%23FFFFFF,red/K03364%09%23FFFFFF,green/
csv00230	Purine metabolism	Metabolism	Nucleotide metabolism	1	1	2	72	0.984561	1	Csa_3G904100	Csa_3G033230	http://www.kegg.jp/kegg-bin/show_pathway?map00230/K00759%09%23FFFFFF,green/K00948%09%23FFFFFF,red/
csv03015	mRNA surveillance pathway	Genetic Information Processing	Translation	0	2	2	74	0.986697	1	-	Csa_2G271430,Csa_3G727950	http://www.kegg.jp/kegg-bin/show_pathway?map03015/K06269%09%23FFFFFF,green/K11584%09%23FFFFFF,green/
csv04145	Phagosome	Cellular Processes	Transport and catabolism	0	1	1	53	0.989389	1	-	Csa_4G625570	http://www.kegg.jp/kegg-bin/show_pathway?map04145/K10956%09%23FFFFFF,green/
csv03008	Ribosome biogenesis in eukaryotes	Genetic Information Processing	Translation	1	0	1	54	0.990265	1	Csa_7G390220	-	http://www.kegg.jp/kegg-bin/show_pathway?map03008/K14549%09%23FFFFFF,red/
csv03040	Spliceosome	Genetic Information Processing	Transcription	0	1	1	114	0.999946	1	-	Csa_5G514500	http://www.kegg.jp/kegg-bin/show_pathway?map03040/K03283%09%23FFFFFF,green/
csv03010	Ribosome	Genetic Information Processing	Translation	1	0	1	200	1	1	Csa_5G524750	-	http://www.kegg.jp/kegg-bin/show_pathway?map03010/K02935%09%23FFFFFF,red/

## Sheet: H2S vs C
Table S3 KEGG pathway analysis of DEGs at transcriptome levels in H2S vs C (continued).
PathwayID	Pathway	Level1	Level2	Up_number	Down_number	DEG_number	total_number	Pvalue	FDR	Up_gene	Down_gene	URL
csv00196	Photosynthesis - antenna proteins	Metabolism	Energy metabolism	0	14	14	17	3.09551e-08	3.43601e-06	-	Csa_1G033310,Csa_1G630330,Csa_5G589390,Csa_6G139750,Csa_5G490820,Csa_5G646700,Csa_6G522690,Csa_7G033300,Csa_6G057170,Csa_4G308550,Csa_1G009810,Csa_3G099680,Csa_1G445860,Csa_6G522680	http://www.kegg.jp/kegg-bin/show_pathway?map00196/K08916%09%23FFFFFF,green/K08917%09%23FFFFFF,green/K08907%09%23FFFFFF,green/K08912%09%23FFFFFF,green/K08915%09%23FFFFFF,green/K08914%09%23FFFFFF,green/K08908%09%23FFFFFF,green/K08910%09%23FFFFFF,green/K08913%09%23FFFFFF,green/K08909%09%23FFFFFF,green/
csv00360	Phenylalanine metabolism	Metabolism	Amino acid metabolism	11	10	21	42	5.95069e-06	0.000330263	Csa_5G158580,Csa_2G264020,Csa_6G445240,Csa_3G889160,Csa_2G382520,Csa_6G405960,Csa_4G629470,Csa_6G155030,Csa_1G004100,Csa_6G423980,Csa_6G147460	Csa_6G445770,Csa_6G423470,Csa_7G430240,Csa_2G048330,Csa_4G008770,Csa_4G008780,Csa_6G446290,Csa_6G445750,Csa_4G314440,Csa_6G445760	http://www.kegg.jp/kegg-bin/show_pathway?map00360/K01904%09%23FFFFFF,green/K00276%09%23FFFFFF,purple/K10775%09%23FFFFFF,purple/K01426%09%23FFFFFF,red/K14454%09%23FFFFFF,red/K00815%09%23FFFFFF,red/K07253%09%23FFFFFF,green/K00811%09%23FFFFFF,red/
csv00350	Tyrosine metabolism	Metabolism	Amino acid metabolism	13	4	17	31	9.45011e-06	0.000349654	Csa_5G158580,Csa_7G320050,Csa_6G361240,Csa_3G889160,Csa_2G382520,Csa_3G164480,Csa_6G511740,Csa_6G361260,Csa_4G629470,Csa_6G155030,Csa_1G004100,Csa_6G423980,Csa_1G073640	Csa_6G423470,Csa_4G314440,Csa_2G336130,Csa_5G147470	http://www.kegg.jp/kegg-bin/show_pathway?map00350/K01555%09%23FFFFFF,red/K01800%09%23FFFFFF,green/K00422%09%23FFFFFF,red/K00121%09%23FFFFFF,red/K00276%09%23FFFFFF,purple/K18857%09%23FFFFFF,red/K01557%09%23FFFFFF,red/K14454%09%23FFFFFF,red/K07253%09%23FFFFFF,green/K00001%09%23FFFFFF,green/K00815%09%23FFFFFF,red/K00811%09%23FFFFFF,red/
csv00410	beta-Alanine metabolism	Metabolism	Metabolism of other amino acids	14	2	16	29	1.56953e-05	0.000435545	Csa_5G158580,Csa_7G448900,Csa_1G005520,Csa_7G426460,Csa_3G127100,Csa_7G065130,Csa_1G042970,Csa_1G031730,Csa_7G066830,Csa_3G604620,Csa_1G004100,Csa_6G423980,Csa_2G000460,Csa_4G608110	Csa_6G423470,Csa_5G348050	http://www.kegg.jp/kegg-bin/show_pathway?map00410/K00207%09%23FFFFFF,red/K01580%09%23FFFFFF,purple/K13366%09%23FFFFFF,red/K05605%09%23FFFFFF,red/K01431%09%23FFFFFF,red/K14085%09%23FFFFFF,red/K00276%09%23FFFFFF,purple/K00128%09%23FFFFFF,red/K00140%09%23FFFFFF,red/K00797%09%23FFFFFF,red/K12259%09%23FFFFFF,red/
csv00940	Phenylpropanoid biosynthesis	Metabolism	Biosynthesis of other secondary metabolites	19	16	35	94	2.68277e-05	0.000595576	Csa_3G736970,Csa_1G062960,Csa_6G445240,Csa_4G031070,Csa_4G091880,Csa_6G405960,Csa_5G167220,Csa_4G285740,Csa_4G026850,Csa_6G490230,Csa_4G443110,Csa_3G881810,Csa_2G421020,Csa_5G612840,Csa_1G611290,Csa_4G285730,Csa_6G147460,Csa_3G874320,Csa_2G346020	Csa_6G445770,Csa_1G064150,Csa_7G430240,Csa_4G651760,Csa_3G716870,Csa_2G048330,Csa_3G539670,Csa_4G008770,Csa_4G008780,Csa_1G586250,Csa_7G049140,Csa_5G262770,Csa_6G446290,Csa_6G445750,Csa_7G058560,Csa_6G445760	http://www.kegg.jp/kegg-bin/show_pathway?map00940/K01188%09%23FFFFFF,red/K00083%09%23FFFFFF,red/K01904%09%23FFFFFF,green/K05350%09%23FFFFFF,purple/K18368%09%23FFFFFF,green/K05349%09%23FFFFFF,red/K09753%09%23FFFFFF,green/K13066%09%23FFFFFF,red/K00430%09%23FFFFFF,purple/K10775%09%23FFFFFF,purple/
csv00195	Photosynthesis	Metabolism	Energy metabolism	1	15	16	33	0.00012443	0.00230196	Csa_6G045160	Csa_1G714680,Csa_6G483300,Csa_2G010330,Csa_3G222790,Csa_6G525340,Csa_4G064020,Csa_1G168350,Csa_7G378440,Csa_3G060980,Csa_1G066480,Csa_7G047350,Csa_2G074240,Csa_3G147780,Csa_3G222800,Csa_3G483830	http://www.kegg.jp/kegg-bin/show_pathway?map00195/K08901%09%23FFFFFF,green/K08902%09%23FFFFFF,green/K02695%09%23FFFFFF,green/K02692%09%23FFFFFF,green/K02698%09%23FFFFFF,green/K08905%09%23FFFFFF,green/K02694%09%23FFFFFF,green/K03541%09%23FFFFFF,green/K02721%09%23FFFFFF,green/K02699%09%23FFFFFF,green/K02701%09%23FFFFFF,green/K02639%09%23FFFFFF,purple/K14332%09%23FFFFFF,green/
csv00906	Carotenoid biosynthesis	Metabolism	Metabolism of terpenoids and polyketides	10	3	13	25	0.000223113	0.00353793	Csa_4G015720,Csa_5G320430,Csa_4G056640,Csa_4G280510,Csa_4G269130,Csa_6G523440,Csa_5G152820,Csa_4G001730,Csa_3G183920,Csa_4G011080	Csa_6G106700,Csa_2G000360,Csa_1G435760	http://www.kegg.jp/kegg-bin/show_pathway?map00906/K17912%09%23FFFFFF,green/K09840%09%23FFFFFF,purple/K14593%09%23FFFFFF,red/K15746%09%23FFFFFF,red/K06444%09%23FFFFFF,green/K15744%09%23FFFFFF,red/K02293%09%23FFFFFF,red/K02291%09%23FFFFFF,red/K09842%09%23FFFFFF,red/
csv00220	Arginine biosynthesis	Metabolism	Amino acid metabolism	13	3	16	35	0.000294341	0.00408398	Csa_4G192110,Csa_3G889160,Csa_3G902910,Csa_2G382520,Csa_3G859690,Csa_3G734910,Csa_3G902920,Csa_6G117740,Csa_3G304140,Csa_2G370510,Csa_3G902410,Csa_7G448000,Csa_2G349020	Csa_5G410730,Csa_6G448150,Csa_4G025140	http://www.kegg.jp/kegg-bin/show_pathway?map00220/K00611%09%23FFFFFF,red/K00620%09%23FFFFFF,red/K01915%09%23FFFFFF,purple/K00814%09%23FFFFFF,red/K14272%09%23FFFFFF,red/K01438%09%23FFFFFF,red/K14454%09%23FFFFFF,red/K01755%09%23FFFFFF,red/K00261%09%23FFFFFF,purple/K14677%09%23FFFFFF,red/K00811%09%23FFFFFF,red/
csv00400	Phenylalanine, tyrosine and tryptophan biosynthesis	Metabolism	Amino acid metabolism	12	5	17	39	0.000385426	0.00417951	Csa_2G417830,Csa_3G889160,Csa_2G382520,Csa_5G638330,Csa_7G064020,Csa_6G487590,Csa_3G073840,Csa_4G629470,Csa_1G064170,Csa_2G008130,Csa_6G155030,Csa_3G843770	Csa_6G513690,Csa_6G499800,Csa_5G643330,Csa_1G145980,Csa_2G296130	http://www.kegg.jp/kegg-bin/show_pathway?map00400/K01695%09%23FFFFFF,red/K01696%09%23FFFFFF,red/K15227%09%23FFFFFF,red/K06001%09%23FFFFFF,green/K00891%09%23FFFFFF,purple/K01850%09%23FFFFFF,red/K14454%09%23FFFFFF,red/K00815%09%23FFFFFF,red/K05359%09%23FFFFFF,purple/K00811%09%23FFFFFF,red/K01626%09%23FFFFFF,purple/
csv04075	Plant hormone signal transduction	Environmental Information Processing	Signal transduction	21	40	61	213	0.000393921	0.00417951	Csa_3G389850,Csa_2G350290,Csa_3G118740,Csa_7G391240,Csa_5G374730,Csa_6G499740,Csa_7G070254,Csa_3G878200,Csa_1G470460,Csa_2G006790,Csa_7G009140,Csa_7G007930,Csa_3G017090,Csa_3G199660,Csa_3G178550,Csa_1G572450,Csa_4G036580,Csa_1G422480,Csa_1G572420,Csa_3G444560,Csa_2G035330	Csa_1G408720,Csa_6G516940,Csa_4G645980,Csa_7G008430,Csa_3G011620,Csa_7G405830,Csa_1G597690,Csa_1G600830,Csa_6G501930,Csa_2G170820,Csa_6G492310,Csa_3G143580,Csa_7G452370,Csa_3G645940,Csa_7G448810,Csa_5G603910,Csa_5G421370,Csa_6G012800,Csa_5G576720,Csa_4G312880,Csa_3G143570,Csa_2G381760,Csa_4G641660,Csa_7G378520,Csa_3G651720,Csa_3G289300,Csa_2G355020,Csa_2G200440,Csa_4G052740,Csa_2G373410,Csa_3G902…	http://www.kegg.jp/kegg-bin/show_pathway?map04075/K14505%09%23FFFFFF,purple/K14487%09%23FFFFFF,green/K14495%09%23FFFFFF,green/K14498%09%23FFFFFF,red/K14497%09%23FFFFFF,red/K13449%09%23FFFFFF,red/K14503%09%23FFFFFF,green/K14488%09%23FFFFFF,purple/K14485%09%23FFFFFF,green/K14490%09%23FFFFFF,purple/K14496%09%23FFFFFF,purple/K14484%09%23FFFFFF,purple/K13416%09%23FFFFFF,green/K13464%09%23FFFFFF,green/…
csv04016	MAPK signaling pathway - plant	Environmental Information Processing	Signal transduction	14	19	33	98	0.000414185	0.00417951	Csa_3G389850,Csa_5G529950,Csa_4G658590,Csa_4G045070,Csa_6G499740,Csa_7G070254,Csa_3G878200,Csa_5G152170,Csa_1G470460,Csa_2G006790,Csa_3G017090,Csa_6G509030,Csa_3G178550,Csa_6G522700	Csa_4G645980,Csa_1G479630,Csa_3G011620,Csa_7G405830,Csa_6G338080,Csa_6G509020,Csa_6G012800,Csa_4G312880,Csa_2G381760,Csa_5G385380,Csa_3G651720,Csa_7G354520,Csa_5G636620,Csa_3G902310,Csa_5G217670,Csa_1G025960,Csa_3G845500,Csa_7G060160,Csa_2G416770	http://www.kegg.jp/kegg-bin/show_pathway?map04016/K20714%09%23FFFFFF,green/K13447%09%23FFFFFF,purple/K20536%09%23FFFFFF,green/K13424%09%23FFFFFF,green/K03781%09%23FFFFFF,red/K14498%09%23FFFFFF,red/K14497%09%23FFFFFF,red/K13449%09%23FFFFFF,red/K02183%09%23FFFFFF,green/K14496%09%23FFFFFF,purple/K13416%09%23FFFFFF,green/K14509%09%23FFFFFF,green/K20537%09%23FFFFFF,red/K20716%09%23FFFFFF,green/K20547%…
csv00950	Isoquinoline alkaloid biosynthesis	Metabolism	Biosynthesis of other secondary metabolites	8	1	9	15	0.000543684	0.00502092	Csa_5G158580,Csa_3G889160,Csa_2G382520,Csa_4G629470,Csa_6G155030,Csa_1G004100,Csa_6G423980,Csa_1G073640	Csa_6G423470	http://www.kegg.jp/kegg-bin/show_pathway?map00950/K00276%09%23FFFFFF,purple/K14454%09%23FFFFFF,red/K00815%09%23FFFFFF,red/K00422%09%23FFFFFF,red/K00811%09%23FFFFFF,red/
csv00910	Nitrogen metabolism	Metabolism	Energy metabolism	2	11	13	27	0.000588036	0.00502092	Csa_4G192110,Csa_3G304140	Csa_5G410730,Csa_6G448150,Csa_1G120470,Csa_6G446560,Csa_3G207890,Csa_3G776970,Csa_4G377160,Csa_5G383350,Csa_4G025140,Csa_1G120450,Csa_5G383850	http://www.kegg.jp/kegg-bin/show_pathway?map00910/K00366%09%23FFFFFF,green/K01915%09%23FFFFFF,purple/K00261%09%23FFFFFF,purple/K01674%09%23FFFFFF,green/K10534%09%23FFFFFF,green/
csv00500	Starch and sucrose metabolism	Metabolism	Carbohydrate metabolism	16	10	26	73	0.000636003	0.00504259	Csa_7G030510,Csa_4G031070,Csa_6G500540,Csa_6G357030,Csa_3G859710,Csa_4G280410,Csa_2G248700,Csa_2G307340,Csa_7G392380,Csa_6G188010,Csa_5G612840,Csa_3G009420,Csa_1G611290,Csa_6G080910,Csa_3G345390,Csa_2G296010	Csa_1G615730,Csa_1G064150,Csa_5G174590,Csa_3G175690,Csa_3G133950,Csa_3G149890,Csa_6G520240,Csa_7G450770,Csa_1G005560,Csa_4G028470	http://www.kegg.jp/kegg-bin/show_pathway?map00500/K01188%09%23FFFFFF,red/K00700%09%23FFFFFF,red/K05350%09%23FFFFFF,purple/K00844%09%23FFFFFF,green/K05349%09%23FFFFFF,red/K16055%09%23FFFFFF,purple/K01214%09%23FFFFFF,red/K01193%09%23FFFFFF,green/K19892%09%23FFFFFF,red/K00705%09%23FFFFFF,red/K00847%09%23FFFFFF,red/K00688%09%23FFFFFF,red/K01177%09%23FFFFFF,green/K00975%09%23FFFFFF,purple/K01087%09%23…
csv00960	Tropane, piperidine and pyridine alkaloid biosynthesis	Metabolism	Biosynthesis of other secondary metabolites	8	1	9	16	0.00103297	0.00764397	Csa_5G158580,Csa_2G382520,Csa_6G155030,Csa_1G004100,Csa_6G423980,Csa_3G733970,Csa_4G629470,Csa_3G889160	Csa_6G423470	http://www.kegg.jp/kegg-bin/show_pathway?map00960/K00276%09%23FFFFFF,purple/K08081%09%23FFFFFF,red/K14454%09%23FFFFFF,red/K00815%09%23FFFFFF,red/K00811%09%23FFFFFF,red/
csv00270	Cysteine and methionine metabolism	Metabolism	Amino acid metabolism	18	3	21	58	0.00162392	0.011266	Csa_4G326550,Csa_1G597100,Csa_2G036680,Csa_3G889160,Csa_6G496970,Csa_2G382520,Csa_3G117980,Csa_7G009190,Csa_6G062290,Csa_4G629470,Csa_2G012660,Csa_1G574810,Csa_2G352930,Csa_1G599580,Csa_3G002890,Csa_6G155030,Csa_3G604620,Csa_3G150200	Csa_5G609660,Csa_4G361270,Csa_3G006640	http://www.kegg.jp/kegg-bin/show_pathway?map00270/K01738%09%23FFFFFF,red/K00025%09%23FFFFFF,red/K01244%09%23FFFFFF,red/K00558%09%23FFFFFF,green/K14454%09%23FFFFFF,red/K01761%09%23FFFFFF,red/K08963%09%23FFFFFF,red/K00547%09%23FFFFFF,green/K00811%09%23FFFFFF,red/K00549%09%23FFFFFF,red/K00826%09%23FFFFFF,red/K00827%09%23FFFFFF,red/K01611%09%23FFFFFF,red/K05933%09%23FFFFFF,green/K00815%09%23FFFFFF,re…
csv04626	Plant-pathogen interaction	Organismal Systems	Environmental adaptation	8	23	31	99	0.00234371	0.0153031	Csa_5G135340,Csa_5G529950,Csa_7G070254,Csa_5G152170,Csa_3G854250,Csa_6G522700,Csa_5G638350,Csa_5G561760	Csa_5G571560,Csa_3G835850,Csa_4G011740,Csa_3G588520,Csa_6G513780,Csa_2G075440,Csa_4G172540,Csa_5G608150,Csa_3G727960,Csa_1G015780,Csa_5G385380,Csa_1G025020,Csa_3G607120,Csa_3G651720,Csa_2G286450,Csa_2G406780,Csa_5G636620,Csa_1G025960,Csa_6G505910,Csa_3G845500,Csa_7G060160,Csa_7G343300,Csa_3G144210	http://www.kegg.jp/kegg-bin/show_pathway?map04626/K09487%09%23FFFFFF,red/K13448%09%23FFFFFF,purple/K05391%09%23FFFFFF,purple/K13447%09%23FFFFFF,purple/K13459%09%23FFFFFF,green/K13424%09%23FFFFFF,green/K13413%09%23FFFFFF,green/K13456%09%23FFFFFF,green/K13449%09%23FFFFFF,red/K13414%09%23FFFFFF,green/K13412%09%23FFFFFF,green/K02183%09%23FFFFFF,green/K13416%09%23FFFFFF,green/K13420%09%23FFFFFF,red/
csv00780	Biotin metabolism	Metabolism	Metabolism of cofactors and vitamins	6	1	7	12	0.00294944	0.0181882	Csa_2G350440,Csa_1G597750,Csa_6G041720,Csa_1G447400,Csa_4G029990,Csa_4G286380	Csa_3G843800	http://www.kegg.jp/kegg-bin/show_pathway?map00780/K00059%09%23FFFFFF,purple/K01012%09%23FFFFFF,red/K09458%09%23FFFFFF,red/K00208%09%23FFFFFF,red/K02372%09%23FFFFFF,red/
csv00061	Fatty acid biosynthesis	Metabolism	Lipid metabolism	10	2	12	28	0.00329317	0.0190712	Csa_4G092990,Csa_2G350440,Csa_1G597750,Csa_4G438530,Csa_6G007970,Csa_5G576640,Csa_1G447400,Csa_1G533500,Csa_4G029990,Csa_4G286380	Csa_3G843800,Csa_1G397120	http://www.kegg.jp/kegg-bin/show_pathway?map00061/K00645%09%23FFFFFF,red/K00059%09%23FFFFFF,purple/K01897%09%23FFFFFF,red/K10781%09%23FFFFFF,purple/K02160%09%23FFFFFF,red/K01961%09%23FFFFFF,red/K09458%09%23FFFFFF,red/K02372%09%23FFFFFF,red/K00208%09%23FFFFFF,red/
csv00250	Alanine, aspartate and glutamate metabolism	Metabolism	Amino acid metabolism	12	5	17	46	0.00343626	0.0190712	Csa_4G326550,Csa_4G192110,Csa_4G570720,Csa_5G585380,Csa_3G889160,Csa_2G382520,Csa_1G031730,Csa_3G304140,Csa_2G370510,Csa_7G448000,Csa_2G349020,Csa_7G189190	Csa_5G410730,Csa_6G448150,Csa_4G618430,Csa_4G025140,Csa_5G348050	http://www.kegg.jp/kegg-bin/show_pathway?map00250/K01939%09%23FFFFFF,red/K16871%09%23FFFFFF,green/K01580%09%23FFFFFF,purple/K01915%09%23FFFFFF,purple/K01955%09%23FFFFFF,red/K00814%09%23FFFFFF,red/K00827%09%23FFFFFF,red/K14272%09%23FFFFFF,red/K14454%09%23FFFFFF,red/K01755%09%23FFFFFF,red/K00261%09%23FFFFFF,purple/K01956%09%23FFFFFF,red/K00811%09%23FFFFFF,red/
csv00480	Glutathione metabolism	Metabolism	Metabolism of other amino acids	10	10	20	59	0.00500346	0.0260597	Csa_4G064640,Csa_2G035460,Csa_5G177050,Csa_2G035470,Csa_4G064120,Csa_4G303130,Csa_4G303690,Csa_3G604620,Csa_7G395820,Csa_7G395800	Csa_3G889840,Csa_3G133890,Csa_1G479610,Csa_1G033140,Csa_3G133880,Csa_1G024860,Csa_1G033120,Csa_4G304760,Csa_4G303680,Csa_1G033130	http://www.kegg.jp/kegg-bin/show_pathway?map00480/K00799%09%23FFFFFF,purple/K00434%09%23FFFFFF,green/K01255%09%23FFFFFF,red/K00797%09%23FFFFFF,red/
csv00290	Valine, leucine and isoleucine biosynthesis	Metabolism	Amino acid metabolism	7	0	7	13	0.00534415	0.0260597	Csa_6G448730,Csa_7G051370,Csa_6G496970,Csa_2G352930,Csa_6G448720,Csa_3G363180,Csa_6G448740	-	http://www.kegg.jp/kegg-bin/show_pathway?map00290/K00826%09%23FFFFFF,red/K00053%09%23FFFFFF,red/K01754%09%23FFFFFF,red/K01649%09%23FFFFFF,red/
csv00280	Valine, leucine and isoleucine degradation	Metabolism	Amino acid metabolism	13	0	13	33	0.00539976	0.0260597	Csa_7G387180,Csa_4G326550,Csa_7G448900,Csa_1G005520,Csa_3G823050,Csa_3G133140,Csa_6G496970,Csa_6G395130,Csa_3G127100,Csa_2G352930,Csa_7G066830,Csa_3G164470,Csa_4G608110	-	http://www.kegg.jp/kegg-bin/show_pathway?map00280/K00166%09%23FFFFFF,red/K01640%09%23FFFFFF,red/K05605%09%23FFFFFF,red/K01968%09%23FFFFFF,red/K00827%09%23FFFFFF,red/K00826%09%23FFFFFF,red/K14085%09%23FFFFFF,red/K07513%09%23FFFFFF,red/K09699%09%23FFFFFF,red/K00128%09%23FFFFFF,red/K00140%09%23FFFFFF,red/
csv00592	alpha-Linolenic acid metabolism	Metabolism	Lipid metabolism	7	4	11	27	0.00764689	0.0353669	Csa_7G320050,Csa_3G133140,Csa_1G433610,Csa_7G075600,Csa_2G415540,Csa_3G731060,Csa_5G622450	Csa_7G449420,Csa_5G366670,Csa_3G859730,Csa_2G360780	http://www.kegg.jp/kegg-bin/show_pathway?map00592/K01723%09%23FFFFFF,purple/K10525%09%23FFFFFF,green/K00232%09%23FFFFFF,red/K18857%09%23FFFFFF,red/K08241%09%23FFFFFF,green/K00454%09%23FFFFFF,green/K07513%09%23FFFFFF,red/K10526%09%23FFFFFF,red/K01047%09%23FFFFFF,red/
csv00770	Pantothenate and CoA biosynthesis	Metabolism	Metabolism of cofactors and vitamins	6	1	7	15	0.0140457	0.0623631	Csa_7G051370,Csa_7G338120,Csa_6G496970,Csa_7G065130,Csa_1G042970,Csa_2G352930	Csa_1G002720	http://www.kegg.jp/kegg-bin/show_pathway?map00770/K01598%09%23FFFFFF,green/K00826%09%23FFFFFF,red/K00207%09%23FFFFFF,red/K00053%09%23FFFFFF,red/K00606%09%23FFFFFF,red/K01431%09%23FFFFFF,red/
csv00330	Arginine and proline metabolism	Metabolism	Amino acid metabolism	14	0	14	42	0.0203255	0.0867744	Csa_7G448900,Csa_1G025890,Csa_2G264020,Csa_2G036680,Csa_1G005520,Csa_3G889160,Csa_7G426460,Csa_2G382520,Csa_4G017130,Csa_3G150820,Csa_6G062290,Csa_3G604620,Csa_3G150200,Csa_2G000460	-	http://www.kegg.jp/kegg-bin/show_pathway?map00330/K00819%09%23FFFFFF,red/K13366%09%23FFFFFF,red/K14085%09%23FFFFFF,red/K01611%09%23FFFFFF,red/K01426%09%23FFFFFF,red/K00472%09%23FFFFFF,red/K14454%09%23FFFFFF,red/K00128%09%23FFFFFF,red/K00797%09%23FFFFFF,red/K12259%09%23FFFFFF,red/K00811%09%23FFFFFF,red/
csv00710	Carbon fixation in photosynthetic organisms	Metabolism	Energy metabolism	11	5	16	52	0.0293864	0.120811	Csa_5G622460,Csa_5G577360,Csa_6G077460,Csa_3G889160,Csa_3G117980,Csa_7G239010,Csa_5G576660,Csa_3G750920,Csa_5G571460,Csa_7G448000,Csa_2G349020	Csa_7G195260,Csa_7G239050,Csa_4G627210,Csa_4G307360,Csa_5G609710	http://www.kegg.jp/kegg-bin/show_pathway?map00710/K00025%09%23FFFFFF,red/K03841%09%23FFFFFF,green/K00814%09%23FFFFFF,red/K00927%09%23FFFFFF,red/K14272%09%23FFFFFF,red/K00134%09%23FFFFFF,green/K14454%09%23FFFFFF,red/K01595%09%23FFFFFF,purple/K00615%09%23FFFFFF,red/K01602%09%23FFFFFF,green/K01807%09%23FFFFFF,red/K01623%09%23FFFFFF,purple/K00051%09%23FFFFFF,red/
csv00052	Galactose metabolism	Metabolism	Carbohydrate metabolism	5	8	13	40	0.0306329	0.121438	Csa_5G601500,Csa_3G680120,Csa_4G167980,Csa_4G097630,Csa_4G631570	Csa_1G615730,Csa_5G174590,Csa_1G181330,Csa_7G407800,Csa_3G838720,Csa_4G052620,Csa_5G155470,Csa_7G450770	http://www.kegg.jp/kegg-bin/show_pathway?map00052/K01784%09%23FFFFFF,green/K06611%09%23FFFFFF,green/K01193%09%23FFFFFF,green/K18819%09%23FFFFFF,purple/K06617%09%23FFFFFF,purple/K00850%09%23FFFFFF,red/K00844%09%23FFFFFF,green/
csv00071	Fatty acid degradation	Metabolism	Lipid metabolism	9	2	11	33	0.0375928	0.14389	Csa_7G448900,Csa_7G320050,Csa_6G361240,Csa_1G005520,Csa_3G133140,Csa_6G361260,Csa_6G007970,Csa_2G415540,Csa_3G731060	Csa_1G528600,Csa_5G147470	http://www.kegg.jp/kegg-bin/show_pathway?map00071/K01897%09%23FFFFFF,red/K00121%09%23FFFFFF,red/K14085%09%23FFFFFF,red/K00232%09%23FFFFFF,red/K18857%09%23FFFFFF,red/K07513%09%23FFFFFF,red/K00128%09%23FFFFFF,red/K00001%09%23FFFFFF,green/K15401%09%23FFFFFF,green/
csv00040	Pentose and glucuronate interconversions	Metabolism	Carbohydrate metabolism	6	13	19	70	0.0631595	0.23369	Csa_7G343850,Csa_2G049960,Csa_7G343870,Csa_1G569210,Csa_7G447990,Csa_3G827350	Csa_3G624020,Csa_3G133180,Csa_3G000060,Csa_7G404800,Csa_4G043950,Csa_7G405820,Csa_1G049960,Csa_5G622520,Csa_5G517820,Csa_2G350210,Csa_1G012150,Csa_4G094000,Csa_5G568300	http://www.kegg.jp/kegg-bin/show_pathway?map00040/K00012%09%23FFFFFF,green/K01728%09%23FFFFFF,purple/K01213%09%23FFFFFF,green/K01805%09%23FFFFFF,red/K01051%09%23FFFFFF,purple/
csv00073	Cutin, suberine and wax biosynthesis	Metabolism	Lipid metabolism	2	4	6	16	0.0676775	0.242329	Csa_6G152310,Csa_6G079750	Csa_3G848300,Csa_5G153010,Csa_6G004550,Csa_1G528600	http://www.kegg.jp/kegg-bin/show_pathway?map00073/K15403%09%23FFFFFF,green/K15398%09%23FFFFFF,green/K13356%09%23FFFFFF,red/K15404%09%23FFFFFF,red/K15401%09%23FFFFFF,green/
csv00260	Glycine, serine and threonine metabolism	Metabolism	Amino acid metabolism	15	2	17	63	0.0796011	0.276116	Csa_5G158580,Csa_6G448730,Csa_4G326550,Csa_7G448900,Csa_2G351700,Csa_4G197830,Csa_3G002370,Csa_1G064170,Csa_3G651740,Csa_6G448720,Csa_1G004100,Csa_2G349020,Csa_6G423980,Csa_3G843770,Csa_6G448740	Csa_6G423470,Csa_5G643330	http://www.kegg.jp/kegg-bin/show_pathway?map00260/K01695%09%23FFFFFF,red/K01754%09%23FFFFFF,red/K00058%09%23FFFFFF,red/K15633%09%23FFFFFF,red/K01696%09%23FFFFFF,red/K06001%09%23FFFFFF,green/K00827%09%23FFFFFF,red/K00276%09%23FFFFFF,purple/K14272%09%23FFFFFF,red/K14085%09%23FFFFFF,red/K00281%09%23FFFFFF,red/K00831%09%23FFFFFF,red/
csv00010	Glycolysis / Gluconeogenesis	Metabolism	Carbohydrate metabolism	15	8	23	91	0.0882787	0.296938	Csa_7G448900,Csa_1G701210,Csa_7G320050,Csa_1G014400,Csa_6G361240,Csa_1G005520,Csa_5G580610,Csa_2G009470,Csa_6G361260,Csa_4G197830,Csa_7G239010,Csa_5G576660,Csa_6G450370,Csa_3G750920,Csa_4G097630	Csa_7G195260,Csa_1G615730,Csa_5G603950,Csa_7G239050,Csa_1G532350,Csa_3G119860,Csa_4G307360,Csa_5G147470	http://www.kegg.jp/kegg-bin/show_pathway?map00010/K00895%09%23FFFFFF,red/K00844%09%23FFFFFF,green/K00161%09%23FFFFFF,green/K01792%09%23FFFFFF,green/K00927%09%23FFFFFF,red/K14085%09%23FFFFFF,red/K00134%09%23FFFFFF,green/K00128%09%23FFFFFF,red/K01623%09%23FFFFFF,purple/K00873%09%23FFFFFF,red/K01568%09%23FFFFFF,green/K03841%09%23FFFFFF,green/K15633%09%23FFFFFF,red/K00131%09%23FFFFFF,red/K00121%09%23…
csv00591	Linoleic acid metabolism	Metabolism	Lipid metabolism	1	1	2	3	0.095642	0.312243	Csa_1G433610	Csa_7G449420	http://www.kegg.jp/kegg-bin/show_pathway?map00591/K00454%09%23FFFFFF,green/K01047%09%23FFFFFF,red/
csv00030	Pentose phosphate pathway	Metabolism	Carbohydrate metabolism	9	3	12	43	0.104214	0.321454	Csa_1G701210,Csa_6G077460,Csa_5G606770,Csa_2G009470,Csa_5G160240,Csa_5G576660,Csa_3G750920,Csa_4G097630,Csa_5G571460	Csa_7G195260,Csa_4G307360,Csa_5G139130	http://www.kegg.jp/kegg-bin/show_pathway?map00030/K00895%09%23FFFFFF,red/K03841%09%23FFFFFF,green/K00131%09%23FFFFFF,red/K00616%09%23FFFFFF,red/K01057%09%23FFFFFF,purple/K00615%09%23FFFFFF,red/K00850%09%23FFFFFF,red/K01807%09%23FFFFFF,red/K01623%09%23FFFFFF,purple/
csv00904	Diterpenoid biosynthesis	Metabolism	Metabolism of terpenoids and polyketides	4	0	4	10	0.105702	0.321454	Csa_4G638410,Csa_7G434970,Csa_3G903540,Csa_1G439830	-	http://www.kegg.jp/kegg-bin/show_pathway?map00904/K04123%09%23FFFFFF,red/K04124%09%23FFFFFF,red/K04125%09%23FFFFFF,red/K04122%09%23FFFFFF,red/
csv00640	Propanoate metabolism	Metabolism	Carbohydrate metabolism	7	0	7	22	0.110052	0.321454	Csa_4G092990,Csa_6G395130,Csa_3G127100,Csa_4G438530,Csa_7G066830,Csa_3G164470,Csa_4G608110	-	http://www.kegg.jp/kegg-bin/show_pathway?map00640/K00166%09%23FFFFFF,red/K09699%09%23FFFFFF,red/K02160%09%23FFFFFF,red/K01961%09%23FFFFFF,red/K05605%09%23FFFFFF,red/K00140%09%23FFFFFF,red/
csv00565	Ether lipid metabolism	Metabolism	Lipid metabolism	5	1	6	18	0.111976	0.321454	Csa_1G433610,Csa_2G347140,Csa_1G629050,Csa_1G001490,Csa_5G608060	Csa_3G038190	http://www.kegg.jp/kegg-bin/show_pathway?map00565/K01115%09%23FFFFFF,purple/K01114%09%23FFFFFF,red/K00993%09%23FFFFFF,red/K01047%09%23FFFFFF,red/
csv00051	Fructose and mannose metabolism	Metabolism	Carbohydrate metabolism	7	6	13	48	0.112943	0.321454	Csa_2G049960,Csa_1G701210,Csa_5G576660,Csa_3G750920,Csa_4G097630,Csa_6G080910,Csa_3G345390	Csa_7G195260,Csa_1G615730,Csa_3G300600,Csa_6G008750,Csa_4G307360,Csa_3G859700	http://www.kegg.jp/kegg-bin/show_pathway?map00051/K00895%09%23FFFFFF,red/K00966%09%23FFFFFF,green/K03841%09%23FFFFFF,green/K00844%09%23FFFFFF,green/K01805%09%23FFFFFF,red/K01809%09%23FFFFFF,green/K00847%09%23FFFFFF,red/K00850%09%23FFFFFF,red/K19355%09%23FFFFFF,green/K01623%09%23FFFFFF,purple/
csv00630	Glyoxylate and dicarboxylate metabolism	Metabolism	Carbohydrate metabolism	9	5	14	54	0.135823	0.367717	Csa_4G658590,Csa_2G420990,Csa_2G351700,Csa_3G117980,Csa_3G304140,Csa_3G645990,Csa_3G836500,Csa_1G050360,Csa_2G349020	Csa_5G410730,Csa_6G448150,Csa_1G654900,Csa_5G609710,Csa_5G154230	http://www.kegg.jp/kegg-bin/show_pathway?map00630/K01637%09%23FFFFFF,red/K11517%09%23FFFFFF,red/K00025%09%23FFFFFF,red/K01915%09%23FFFFFF,purple/K03781%09%23FFFFFF,red/K19269%09%23FFFFFF,green/K14272%09%23FFFFFF,red/K00281%09%23FFFFFF,red/K22133%09%23FFFFFF,green/K01638%09%23FFFFFF,red/K01602%09%23FFFFFF,green/K00122%09%23FFFFFF,red/
csv00620	Pyruvate metabolism	Metabolism	Carbohydrate metabolism	11	3	14	54	0.135823	0.367717	Csa_5G622460,Csa_7G448900,Csa_5G577360,Csa_1G005520,Csa_4G092990,Csa_5G580610,Csa_3G117980,Csa_4G438530,Csa_4G001990,Csa_1G050360,Csa_3G363180	Csa_5G603950,Csa_4G627210,Csa_3G076020	http://www.kegg.jp/kegg-bin/show_pathway?map00620/K00025%09%23FFFFFF,red/K02160%09%23FFFFFF,red/K01961%09%23FFFFFF,red/K01649%09%23FFFFFF,red/K00161%09%23FFFFFF,green/K01679%09%23FFFFFF,red/K14085%09%23FFFFFF,red/K01595%09%23FFFFFF,purple/K00128%09%23FFFFFF,red/K01638%09%23FFFFFF,red/K00873%09%23FFFFFF,red/K01759%09%23FFFFFF,green/K00051%09%23FFFFFF,red/
csv00564	Glycerophospholipid metabolism	Metabolism	Lipid metabolism	8	7	15	59	0.142596	0.37686	Csa_6G406540,Csa_4G004780,Csa_1G433610,Csa_2G347140,Csa_1G629050,Csa_1G001490,Csa_7G253210,Csa_5G608060	Csa_3G099600,Csa_2G058110,Csa_7G291720,Csa_1G025050,Csa_3G038190,Csa_5G576650,Csa_7G412840	http://www.kegg.jp/kegg-bin/show_pathway?map00564/K00901%09%23FFFFFF,green/K01114%09%23FFFFFF,red/K13513%09%23FFFFFF,red/K13508%09%23FFFFFF,green/K06130%09%23FFFFFF,red/K00111%09%23FFFFFF,red/K05929%09%23FFFFFF,green/K01115%09%23FFFFFF,purple/K14156%09%23FFFFFF,green/K00993%09%23FFFFFF,red/K08730%09%23FFFFFF,green/K01047%09%23FFFFFF,red/
csv00130	Ubiquinone and other terpenoid-quinone biosynthesis	Metabolism	Metabolism of cofactors and vitamins	4	4	8	29	0.17494	0.443516	Csa_2G059830,Csa_2G238780,Csa_4G629470,Csa_6G155030	Csa_7G430240,Csa_2G048330,Csa_2G348940,Csa_6G501980	http://www.kegg.jp/kegg-bin/show_pathway?map00130/K03809%09%23FFFFFF,purple/K01904%09%23FFFFFF,green/K09833%09%23FFFFFF,red/K00815%09%23FFFFFF,red/K03183%09%23FFFFFF,green/
csv00450	Selenocompound metabolism	Metabolism	Metabolism of other amino acids	4	1	5	16	0.175808	0.443516	Csa_2G215520,Csa_1G599580,Csa_3G002890,Csa_3G144230	Csa_3G113310	http://www.kegg.jp/kegg-bin/show_pathway?map00450/K00549%09%23FFFFFF,red/K13811%09%23FFFFFF,red/K01761%09%23FFFFFF,red/K08247%09%23FFFFFF,green/
csv00902	Monoterpenoid biosynthesis	Metabolism	Metabolism of terpenoids and polyketides	4	0	4	12	0.182376	0.449862	Csa_5G190520,Csa_7G063980,Csa_3G889760,Csa_7G059660	-	http://www.kegg.jp/kegg-bin/show_pathway?map00902/K21373%09%23FFFFFF,red/K21374%09%23FFFFFF,red/
csv00601	Glycosphingolipid biosynthesis - lacto and neolacto series	Metabolism	Glycan biosynthesis and metabolism	0	1	1	1	0.1912	0.461374	-	Csa_3G731870	http://www.kegg.jp/kegg-bin/show_pathway?map00601/K01988%09%23FFFFFF,green/
csv00053	Ascorbate and aldarate metabolism	Metabolism	Carbohydrate metabolism	3	5	8	30	0.20112	0.474986	Csa_7G448900,Csa_3G434960,Csa_1G005520	Csa_3G889840,Csa_1G479610,Csa_1G575130,Csa_1G012150,Csa_4G094000	http://www.kegg.jp/kegg-bin/show_pathway?map00053/K14085%09%23FFFFFF,red/K00012%09%23FFFFFF,green/K00434%09%23FFFFFF,green/K00128%09%23FFFFFF,red/K00469%09%23FFFFFF,purple/
csv00240	Pyrimidine metabolism	Metabolism	Nucleotide metabolism	6	3	9	38	0.294073	0.673606	Csa_5G585380,Csa_7G065130,Csa_3G147210,Csa_1G042970,Csa_5G456730,Csa_7G189190	Csa_1G587400,Csa_7G370750,Csa_1G011520	http://www.kegg.jp/kegg-bin/show_pathway?map00240/K00207%09%23FFFFFF,red/K01489%09%23FFFFFF,green/K16904%09%23FFFFFF,green/K01955%09%23FFFFFF,red/K01431%09%23FFFFFF,red/K13421%09%23FFFFFF,red/K03787%09%23FFFFFF,red/K01956%09%23FFFFFF,red/
csv00562	Inositol phosphate metabolism	Metabolism	Carbohydrate metabolism	7	3	10	43	0.299134	0.673606	Csa_3G434960,Csa_1G629050,Csa_7G066830,Csa_1G001490,Csa_2G439240,Csa_4G031000,Csa_6G500600	Csa_2G372810,Csa_1G575130,Csa_4G009900	http://www.kegg.jp/kegg-bin/show_pathway?map00562/K00915%09%23FFFFFF,green/K01858%09%23FFFFFF,red/K01114%09%23FFFFFF,red/K00469%09%23FFFFFF,purple/K00913%09%23FFFFFF,purple/K00140%09%23FFFFFF,red/
csv00380	Tryptophan metabolism	Metabolism	Amino acid metabolism	5	1	6	24	0.303426	0.673606	Csa_4G658590,Csa_7G448900,Csa_2G264020,Csa_1G005520,Csa_2G375750	Csa_3G619930	http://www.kegg.jp/kegg-bin/show_pathway?map00380/K14085%09%23FFFFFF,red/K01426%09%23FFFFFF,red/K00128%09%23FFFFFF,red/K03781%09%23FFFFFF,red/K11816%09%23FFFFFF,purple/
csv00520	Amino sugar and nucleotide sugar metabolism	Metabolism	Carbohydrate metabolism	9	12	21	98	0.316753	0.676497	Csa_7G030510,Csa_3G859710,Csa_5G139760,Csa_2G248700,Csa_6G509030,Csa_4G002510,Csa_6G526490,Csa_6G080910,Csa_3G345390	Csa_1G615730,Csa_3G300600,Csa_6G008750,Csa_6G509020,Csa_6G510320,Csa_3G149890,Csa_4G052620,Csa_5G155470,Csa_1G267220,Csa_1G534750,Csa_1G012150,Csa_4G094000	http://www.kegg.jp/kegg-bin/show_pathway?map00520/K01784%09%23FFFFFF,green/K00966%09%23FFFFFF,green/K00844%09%23FFFFFF,green/K20547%09%23FFFFFF,purple/K00770%09%23FFFFFF,red/K00012%09%23FFFFFF,green/K01809%09%23FFFFFF,green/K00847%09%23FFFFFF,red/K13648%09%23FFFFFF,green/K00972%09%23FFFFFF,red/K01183%09%23FFFFFF,purple/K00975%09%23FFFFFF,purple/
csv00650	Butanoate metabolism	Metabolism	Carbohydrate metabolism	2	2	4	15	0.318934	0.676497	Csa_3G823050,Csa_1G031730	Csa_4G618430,Csa_5G348050	http://www.kegg.jp/kegg-bin/show_pathway?map00650/K16871%09%23FFFFFF,green/K01580%09%23FFFFFF,purple/K01640%09%23FFFFFF,red/
csv00261	Monobactam biosynthesis	Metabolism	Biosynthesis of other secondary metabolites	2	0	2	6	0.323012	0.676497	Csa_2G215520,Csa_3G144230	-	http://www.kegg.jp/kegg-bin/show_pathway?map00261/K13811%09%23FFFFFF,red/
csv00460	Cyanoamino acid metabolism	Metabolism	Metabolism of other amino acids	5	1	6	25	0.340334	0.681064	Csa_4G031070,Csa_2G055040,Csa_2G055560,Csa_5G612840,Csa_1G611290	Csa_1G064150	http://www.kegg.jp/kegg-bin/show_pathway?map00460/K01188%09%23FFFFFF,red/K08248%09%23FFFFFF,red/K05350%09%23FFFFFF,purple/K05349%09%23FFFFFF,red/
csv00900	Terpenoid backbone biosynthesis	Metabolism	Metabolism of terpenoids and polyketides	6	2	8	35	0.349559	0.681064	Csa_1G600780,Csa_4G507980,Csa_6G487640,Csa_2G074290,Csa_6G185830,Csa_7G029390	Csa_6G067390,Csa_1G009770	http://www.kegg.jp/kegg-bin/show_pathway?map00900/K01823%09%23FFFFFF,red/K00021%09%23FFFFFF,red/K13789%09%23FFFFFF,red/K10960%09%23FFFFFF,green/K01662%09%23FFFFFF,green/K05906%09%23FFFFFF,red/K11778%09%23FFFFFF,red/K00919%09%23FFFFFF,red/
csv00908	Zeatin biosynthesis	Metabolism	Metabolism of terpenoids and polyketides	0	3	3	11	0.353363	0.681064	-	Csa_4G343590,Csa_3G150100,Csa_6G237640	http://www.kegg.jp/kegg-bin/show_pathway?map00908/K00279%09%23FFFFFF,green/K10760%09%23FFFFFF,green/
csv00760	Nicotinate and nicotinamide metabolism	Metabolism	Metabolism of cofactors and vitamins	3	0	3	11	0.353363	0.681064	Csa_1G047450,Csa_3G147210,Csa_3G734170	-	http://www.kegg.jp/kegg-bin/show_pathway?map00760/K03517%09%23FFFFFF,red/K03787%09%23FFFFFF,red/K18551%09%23FFFFFF,red/
csv04146	Peroxisome	Cellular Processes	Transport and catabolism	11	1	12	55	0.355871	0.681064	Csa_4G658590,Csa_3G823050,Csa_3G133140,Csa_1G571850,Csa_6G007970,Csa_7G047330,Csa_3G645990,Csa_2G415540,Csa_6G152310,Csa_3G731060,Csa_1G698530	Csa_2G173050	http://www.kegg.jp/kegg-bin/show_pathway?map04146/K11147%09%23FFFFFF,red/K13348%09%23FFFFFF,red/K11517%09%23FFFFFF,red/K04564%09%23FFFFFF,red/K01897%09%23FFFFFF,red/K01640%09%23FFFFFF,red/K03781%09%23FFFFFF,red/K13347%09%23FFFFFF,green/K00232%09%23FFFFFF,red/K07513%09%23FFFFFF,red/K13356%09%23FFFFFF,red/
csv00905	Brassinosteroid biosynthesis	Metabolism	Metabolism of terpenoids and polyketides	2	0	2	7	0.398974	0.709062	Csa_2G006030,Csa_5G517880	-	http://www.kegg.jp/kegg-bin/show_pathway?map00905/K15639%09%23FFFFFF,red/K12639%09%23FFFFFF,red/
csv04933	AGE-RAGE signaling pathway in diabetic complications	Human Diseases	Endocrine and metabolic diseases	2	1	3	12	0.410359	0.709062	Csa_1G077220,Csa_2G415560	Csa_3G129580	http://www.kegg.jp/kegg-bin/show_pathway?map04933/K04371%09%23FFFFFF,red/K04392%09%23FFFFFF,purple/
csv00941	Flavonoid biosynthesis	Metabolism	Biosynthesis of other secondary metabolites	3	0	3	12	0.410359	0.709062	Csa_3G600020,Csa_5G221960,Csa_5G505170	-	http://www.kegg.jp/kegg-bin/show_pathway?map00941/K00660%09%23FFFFFF,red/K01859%09%23FFFFFF,red/
csv03050	Proteasome	Genetic Information Processing	Folding, sorting and degradation	9	0	9	42	0.411554	0.709062	Csa_2G362420,Csa_2G138700,Csa_3G146470,Csa_7G325720,Csa_6G507070,Csa_6G190480,Csa_1G701930,Csa_4G297510,Csa_2G377360	-	http://www.kegg.jp/kegg-bin/show_pathway?map03050/K02728%09%23FFFFFF,red/K02734%09%23FFFFFF,red/K03032%09%23FFFFFF,red/K03064%09%23FFFFFF,red/K02739%09%23FFFFFF,red/K02726%09%23FFFFFF,red/K02731%09%23FFFFFF,red/K02738%09%23FFFFFF,red/K03036%09%23FFFFFF,red/
csv00600	Sphingolipid metabolism	Metabolism	Lipid metabolism	3	1	4	17	0.414143	0.709062	Csa_6G094720,Csa_1G527930,Csa_6G188080	Csa_4G551650	http://www.kegg.jp/kegg-bin/show_pathway?map00600/K01634%09%23FFFFFF,red/K12349%09%23FFFFFF,red/K04716%09%23FFFFFF,green/
csv00062	Fatty acid elongation	Metabolism	Lipid metabolism	1	5	6	27	0.415041	0.709062	Csa_3G006780	Csa_3G144140,Csa_1G418240,Csa_1G501850,Csa_1G267270,Csa_3G592170	http://www.kegg.jp/kegg-bin/show_pathway?map00062/K15397%09%23FFFFFF,green/K01076%09%23FFFFFF,purple/
csv00920	Sulfur metabolism	Metabolism	Energy metabolism	4	1	5	22	0.415217	0.709062	Csa_2G215520,Csa_2G012660,Csa_1G574810,Csa_3G144230	Csa_1G062380	http://www.kegg.jp/kegg-bin/show_pathway?map00920/K01738%09%23FFFFFF,red/K13811%09%23FFFFFF,red/K05907%09%23FFFFFF,green/
csv04145	Phagosome	Cellular Processes	Transport and catabolism	5	6	11	53	0.435037	0.731653	Csa_2G364570,Csa_3G182070,Csa_2G415560,Csa_1G629200,Csa_5G153160	Csa_2G368830,Csa_1G537560,Csa_7G070770,Csa_4G625570,Csa_2G297190,Csa_3G129580	http://www.kegg.jp/kegg-bin/show_pathway?map04145/K07375%09%23FFFFFF,purple/K07897%09%23FFFFFF,green/K04392%09%23FFFFFF,purple/K07374%09%23FFFFFF,green/K02154%09%23FFFFFF,red/K10956%09%23FFFFFF,green/K08517%09%23FFFFFF,red/
csv02010	ABC transporters	Environmental Information Processing	Membrane transport	0	3	3	13	0.465685	0.757515	-	Csa_3G873270,Csa_6G521010,Csa_3G769610	http://www.kegg.jp/kegg-bin/show_pathway?map02010/K05666%09%23FFFFFF,green/K05658%09%23FFFFFF,green/
csv00430	Taurine and hypotaurine metabolism	Metabolism	Metabolism of other amino acids	1	1	2	8	0.470661	0.757515	Csa_1G031730	Csa_5G348050	http://www.kegg.jp/kegg-bin/show_pathway?map00430/K01580%09%23FFFFFF,purple/
csv00561	Glycerolipid metabolism	Metabolism	Lipid metabolism	5	4	9	44	0.470888	0.757515	Csa_7G448900,Csa_1G005520,Csa_2G000370,Csa_6G324840,Csa_7G253210	Csa_3G099600,Csa_2G058110,Csa_5G365670,Csa_7G412840	http://www.kegg.jp/kegg-bin/show_pathway?map00561/K11155%09%23FFFFFF,red/K00901%09%23FFFFFF,green/K21362%09%23FFFFFF,red/K13513%09%23FFFFFF,red/K14085%09%23FFFFFF,red/K13508%09%23FFFFFF,green/K00128%09%23FFFFFF,red/K01054%09%23FFFFFF,green/
csv00860	Porphyrin and chlorophyll metabolism	Metabolism	Metabolism of cofactors and vitamins	1	6	7	35	0.515136	0.812738	Csa_5G156180	Csa_6G349840,Csa_1G009770,Csa_2G372750,Csa_7G428980,Csa_2G351800,Csa_1G250130	http://www.kegg.jp/kegg-bin/show_pathway?map00860/K13606%09%23FFFFFF,green/K02303%09%23FFFFFF,green/K02492%09%23FFFFFF,green/K01772%09%23FFFFFF,green/K10960%09%23FFFFFF,green/K22013%09%23FFFFFF,purple/
csv00230	Purine metabolism	Metabolism	Nucleotide metabolism	9	5	14	72	0.519859	0.812738	Csa_4G570720,Csa_3G142980,Csa_3G110660,Csa_5G580610,Csa_3G147210,Csa_2G215520,Csa_3G144230,Csa_7G239630,Csa_1G057010	Csa_3G033230,Csa_2G381870,Csa_7G449460,Csa_5G153080,Csa_2G354800	http://www.kegg.jp/kegg-bin/show_pathway?map00230/K01939%09%23FFFFFF,red/K01945%09%23FFFFFF,red/K00951%09%23FFFFFF,green/K00088%09%23FFFFFF,red/K01951%09%23FFFFFF,green/K00759%09%23FFFFFF,green/K03787%09%23FFFFFF,red/K13811%09%23FFFFFF,red/K00873%09%23FFFFFF,red/K00602%09%23FFFFFF,red/K18151%09%23FFFFFF,red/
csv00909	Sesquiterpenoid and triterpenoid biosynthesis	Metabolism	Metabolism of terpenoids and polyketides	1	1	2	9	0.536932	0.827771	Csa_3G097540	Csa_2G353480	http://www.kegg.jp/kegg-bin/show_pathway?map00909/K00511%09%23FFFFFF,green/K15803%09%23FFFFFF,red/
csv01040	Biosynthesis of unsaturated fatty acids	Metabolism	Lipid metabolism	3	0	3	15	0.568486	0.835691	Csa_3G133140,Csa_2G415540,Csa_3G731060	-	http://www.kegg.jp/kegg-bin/show_pathway?map01040/K00232%09%23FFFFFF,red/K07513%09%23FFFFFF,red/
csv00440	Phosphonate and phosphinate metabolism	Metabolism	Metabolism of other amino acids	1	0	1	4	0.572185	0.835691	Csa_5G608060	-	http://www.kegg.jp/kegg-bin/show_pathway?map00440/K00993%09%23FFFFFF,red/
csv00072	Synthesis and degradation of ketone bodies	Metabolism	Lipid metabolism	1	0	1	4	0.572185	0.835691	Csa_3G823050	-	http://www.kegg.jp/kegg-bin/show_pathway?map00072/K01640%09%23FFFFFF,red/
csv00603	Glycosphingolipid biosynthesis - globo and isoglobo series	Metabolism	Glycan biosynthesis and metabolism	0	1	1	4	0.572185	0.835691	-	Csa_3G731870	http://www.kegg.jp/kegg-bin/show_pathway?map00603/K01988%09%23FFFFFF,green/
csv00100	Steroid biosynthesis	Metabolism	Lipid metabolism	2	2	4	21	0.590993	0.849913	Csa_4G103350,Csa_3G588470	Csa_2G353480,Csa_4G409800	http://www.kegg.jp/kegg-bin/show_pathway?map00100/K01052%09%23FFFFFF,red/K00511%09%23FFFFFF,green/K00227%09%23FFFFFF,green/K09828%09%23FFFFFF,red/
csv00340	Histidine metabolism	Metabolism	Amino acid metabolism	2	0	2	10	0.597236	0.849913	Csa_7G448900,Csa_1G005520	-	http://www.kegg.jp/kegg-bin/show_pathway?map00340/K14085%09%23FFFFFF,red/K00128%09%23FFFFFF,red/
csv04712	Circadian rhythm - plant	Organismal Systems	Environmental adaptation	3	2	5	28	0.643247	0.881813	Csa_3G600020,Csa_6G095910,Csa_2G035330	Csa_5G175170,Csa_6G055360	http://www.kegg.jp/kegg-bin/show_pathway?map04712/K00660%09%23FFFFFF,red/K12126%09%23FFFFFF,red/K12133%09%23FFFFFF,red/K16221%09%23FFFFFF,green/K12124%09%23FFFFFF,green/
csv00514	Other types of O-glycan biosynthesis	Metabolism	Glycan biosynthesis and metabolism	1	1	2	11	0.65143	0.881813	Csa_6G401400	Csa_2G061580	http://www.kegg.jp/kegg-bin/show_pathway?map00514/K20782%09%23FFFFFF,red/K03691%09%23FFFFFF,green/
csv00590	Arachidonic acid metabolism	Metabolism	Lipid metabolism	2	0	2	11	0.65143	0.881813	Csa_1G433610,Csa_5G503560	-	http://www.kegg.jp/kegg-bin/show_pathway?map00590/K01254%09%23FFFFFF,red/K01047%09%23FFFFFF,red/
csv00740	Riboflavin metabolism	Metabolism	Metabolism of cofactors and vitamins	0	2	2	11	0.65143	0.881813	-	Csa_5G548110,Csa_6G029440	http://www.kegg.jp/kegg-bin/show_pathway?map00740/K14379%09%23FFFFFF,green/K14652%09%23FFFFFF,green/
csv00310	Lysine degradation	Metabolism	Amino acid metabolism	3	0	3	18	0.697583	0.921806	Csa_7G448900,Csa_1G005520,Csa_1G598330	-	http://www.kegg.jp/kegg-bin/show_pathway?map00310/K14085%09%23FFFFFF,red/K00128%09%23FFFFFF,red/K14157%09%23FFFFFF,red/
csv00730	Thiamine metabolism	Metabolism	Metabolism of cofactors and vitamins	0	3	3	18	0.697583	0.921806	-	Csa_6G067390,Csa_3G078800,Csa_1G528590	http://www.kegg.jp/kegg-bin/show_pathway?map00730/K01662%09%23FFFFFF,green/K03146%09%23FFFFFF,green/K03147%09%23FFFFFF,green/
csv00750	Vitamin B6 metabolism	Metabolism	Metabolism of cofactors and vitamins	1	1	2	13	0.742182	0.969202	Csa_3G002370	Csa_7G451920	http://www.kegg.jp/kegg-bin/show_pathway?map00750/K13248%09%23FFFFFF,green/K00831%09%23FFFFFF,red/
csv04070	Phosphatidylinositol signaling system	Environmental Information Processing	Signal transduction	1	5	6	38	0.761088	0.982334	Csa_2G439240	Csa_3G099600,Csa_2G058110,Csa_2G372810,Csa_4G009900,Csa_5G636620	http://www.kegg.jp/kegg-bin/show_pathway?map04070/K00915%09%23FFFFFF,green/K00901%09%23FFFFFF,green/K02183%09%23FFFFFF,green/K00913%09%23FFFFFF,purple/
csv00300	Lysine biosynthesis	Metabolism	Amino acid metabolism	1	0	1	7	0.773792	0.987252	Csa_2G404730	-	http://www.kegg.jp/kegg-bin/show_pathway?map00300/K10206%09%23FFFFFF,red/
csv03018	RNA degradation	Genetic Information Processing	Folding, sorting and degradation	6	4	10	64	0.80718	1	Csa_1G014400,Csa_7G041980,Csa_1G599450,Csa_6G450370,Csa_4G097630,Csa_1G181360	Csa_2G382610,Csa_1G168920,Csa_6G425790,Csa_2G270190	http://www.kegg.jp/kegg-bin/show_pathway?map03018/K12581%09%23FFFFFF,green/K12606%09%23FFFFFF,red/K01689%09%23FFFFFF,red/K00850%09%23FFFFFF,red/K12608%09%23FFFFFF,red/K04077%09%23FFFFFF,red/
csv00531	Glycosaminoglycan degradation	Metabolism	Glycan biosynthesis and metabolism	1	0	1	8	0.817097	1	Csa_3G165650	-	http://www.kegg.jp/kegg-bin/show_pathway?map00531/K07964%09%23FFFFFF,red/
csv04130	SNARE interactions in vesicular transport	Genetic Information Processing	Folding, sorting and degradation	2	2	4	30	0.852806	1	Csa_3G182070,Csa_4G192200	Csa_3G782680,Csa_6G425730	http://www.kegg.jp/kegg-bin/show_pathway?map04130/K08486%09%23FFFFFF,purple/K08515%09%23FFFFFF,green/K08517%09%23FFFFFF,red/
csv03430	Mismatch repair	Genetic Information Processing	Replication and repair	3	1	4	30	0.852806	1	Csa_1G013800,Csa_6G502800,Csa_5G614640	Csa_1G464550	http://www.kegg.jp/kegg-bin/show_pathway?map03430/K07466%09%23FFFFFF,red/K10740%09%23FFFFFF,red/K10746%09%23FFFFFF,green/K10756%09%23FFFFFF,red/
csv04144	Endocytosis	Cellular Processes	Transport and catabolism	6	11	17	110	0.867972	1	Csa_7G446760,Csa_2G070310,Csa_2G347140,Csa_5G514500,Csa_3G902260,Csa_2G000620	Csa_3G271380,Csa_3G698470,Csa_2G270210,Csa_2G297190,Csa_6G128620,Csa_6G032470,Csa_5G623740,Csa_3G038190,Csa_6G188120,Csa_1G580230,Csa_6G517060	http://www.kegg.jp/kegg-bin/show_pathway?map04144/K12486%09%23FFFFFF,green/K12493%09%23FFFFFF,red/K07904%09%23FFFFFF,green/K12184%09%23FFFFFF,green/K03283%09%23FFFFFF,red/K19476%09%23FFFFFF,purple/K07897%09%23FFFFFF,green/K01115%09%23FFFFFF,purple/K19366%09%23FFFFFF,green/K12194%09%23FFFFFF,red/
csv03030	DNA replication	Genetic Information Processing	Replication and repair	4	0	4	31	0.870432	1	Csa_1G013800,Csa_3G127240,Csa_6G502800,Csa_5G614640	-	http://www.kegg.jp/kegg-bin/show_pathway?map03030/K07466%09%23FFFFFF,red/K10742%09%23FFFFFF,red/K10740%09%23FFFFFF,red/K10756%09%23FFFFFF,red/
csv00510	N-Glycan biosynthesis	Metabolism	Glycan biosynthesis and metabolism	2	1	3	26	0.898873	1	Csa_6G514900,Csa_2G238800	Csa_5G598080	http://www.kegg.jp/kegg-bin/show_pathway?map00510/K12670%09%23FFFFFF,red/K00737%09%23FFFFFF,green/K12669%09%23FFFFFF,red/
csv00790	Folate biosynthesis	Metabolism	Metabolism of cofactors and vitamins	1	1	2	20	0.918179	1	Csa_4G626100	Csa_6G029440	http://www.kegg.jp/kegg-bin/show_pathway?map00790/K01307%09%23FFFFFF,red/K14652%09%23FFFFFF,green/
csv00670	One carbon pool by folate	Metabolism	Metabolism of cofactors and vitamins	1	0	1	13	0.936829	1	Csa_1G057010	-	http://www.kegg.jp/kegg-bin/show_pathway?map00670/K00602%09%23FFFFFF,red/
csv04141	Protein processing in endoplasmic reticulum	Genetic Information Processing	Folding, sorting and degradation	15	4	19	138	0.962417	1	Csa_5G135340,Csa_3G020080,Csa_4G005000,Csa_2G070310,Csa_5G190530,Csa_5G138480,Csa_4G303700,Csa_7G072770,Csa_6G446420,Csa_6G514900,Csa_5G514500,Csa_2G238800,Csa_5G190560,Csa_6G128040,Csa_6G383520	Csa_2G360850,Csa_4G625570,Csa_4G637750,Csa_1G063560	http://www.kegg.jp/kegg-bin/show_pathway?map04141/K09487%09%23FFFFFF,red/K10666%09%23FFFFFF,purple/K13525%09%23FFFFFF,red/K13993%09%23FFFFFF,purple/K12669%09%23FFFFFF,red/K03283%09%23FFFFFF,red/K09580%09%23FFFFFF,red/K12670%09%23FFFFFF,red/K10956%09%23FFFFFF,green/
csv00020	Citrate cycle (TCA cycle)	Metabolism	Carbohydrate metabolism	2	1	3	34	0.97064	1	Csa_3G117980,Csa_4G001990	Csa_5G603950	http://www.kegg.jp/kegg-bin/show_pathway?map00020/K00025%09%23FFFFFF,red/K00161%09%23FFFFFF,green/K01679%09%23FFFFFF,red/
csv04120	Ubiquitin mediated proteolysis	Genetic Information Processing	Folding, sorting and degradation	3	5	8	70	0.970656	1	Csa_5G141120,Csa_6G330470,Csa_6G434330	Csa_3G880030,Csa_6G148230,Csa_6G448100,Csa_3G151540,Csa_5G623730	http://www.kegg.jp/kegg-bin/show_pathway?map04120/K03363%09%23FFFFFF,red/K06688%09%23FFFFFF,red/K10581%09%23FFFFFF,red/K04506%09%23FFFFFF,green/K10144%09%23FFFFFF,green/
csv03060	Protein export	Genetic Information Processing	Folding, sorting and degradation	0	2	2	29	0.983499	1	-	Csa_6G382350,Csa_4G625570	http://www.kegg.jp/kegg-bin/show_pathway?map03060/K10956%09%23FFFFFF,green/K03100%09%23FFFFFF,green/
csv03420	Nucleotide excision repair	Genetic Information Processing	Replication and repair	3	0	3	39	0.98708	1	Csa_1G013800,Csa_6G502800,Csa_5G614640	-	http://www.kegg.jp/kegg-bin/show_pathway?map03420/K07466%09%23FFFFFF,red/K10740%09%23FFFFFF,red/K10756%09%23FFFFFF,red/
csv03410	Base excision repair	Genetic Information Processing	Replication and repair	0	1	1	24	0.99393	1	-	Csa_6G134890	http://www.kegg.jp/kegg-bin/show_pathway?map03410/K01246%09%23FFFFFF,green/
csv03440	Homologous recombination	Genetic Information Processing	Replication and repair	2	0	2	38	0.996927	1	Csa_1G013800,Csa_5G614640	-	http://www.kegg.jp/kegg-bin/show_pathway?map03440/K07466%09%23FFFFFF,red/K10740%09%23FFFFFF,red/
csv03020	RNA polymerase	Genetic Information Processing	Transcription	1	0	1	30	0.998312	1	Csa_1G702030	-	http://www.kegg.jp/kegg-bin/show_pathway?map03020/K03013%09%23FFFFFF,red/
csv03022	Basal transcription factors	Genetic Information Processing	Transcription	0	1	1	32	0.998899	1	-	Csa_4G415910	http://www.kegg.jp/kegg-bin/show_pathway?map03022/K03124%09%23FFFFFF,green/
csv00190	Oxidative phosphorylation	Metabolism	Energy metabolism	1	2	3	74	0.999976	1	Csa_2G364570	Csa_4G293860,Csa_6G095940	http://www.kegg.jp/kegg-bin/show_pathway?map00190/K01507%09%23FFFFFF,green/K02154%09%23FFFFFF,red/
csv03008	Ribosome biogenesis in eukaryotes	Genetic Information Processing	Translation	1	0	1	54	0.99999	1	Csa_1G573700	-	http://www.kegg.jp/kegg-bin/show_pathway?map03008/K14521%09%23FFFFFF,red/
csv03013	RNA transport	Genetic Information Processing	Translation	1	2	3	100	1	1	Csa_7G037660	Csa_3G077610,Csa_7G209580	http://www.kegg.jp/kegg-bin/show_pathway?map03013/K03113%09%23FFFFFF,green/K03236%09%23FFFFFF,red/
csv03015	mRNA surveillance pathway	Genetic Information Processing	Translation	0	1	1	74	1	1	-	Csa_6G447070	http://www.kegg.jp/kegg-bin/show_pathway?map03015/K11584%09%23FFFFFF,green/
csv03040	Spliceosome	Genetic Information Processing	Transcription	3	0	3	114	1	1	Csa_1G145960,Csa_2G070310,Csa_5G514500	-	http://www.kegg.jp/kegg-bin/show_pathway?map03040/K03283%09%23FFFFFF,red/K12836%09%23FFFFFF,red/
csv03010	Ribosome	Genetic Information Processing	Translation	1	1	2	200	1	1	Csa_7G209560	Csa_6G519510	http://www.kegg.jp/kegg-bin/show_pathway?map03010/K02901%09%23FFFFFF,red/K02914%09%23FFFFFF,green/
