# Supplementary material for: H2S Regulation of Metabolism in Cucumber in Response to Salt-Stress Through Transcriptome and Proteome Analysis
Source: Front Plant Sci. 2020 Aug 19;11:1283. doi: 10.3389/fpls.2020.01283 (PMC7466724; doi:10.3389/fpls.2020.01283)
Supplement: Supplementary file 9 [file Table_5.xls]

## Sheet: a
Table S5a KEGG pathway analysis of DEPs at proteomic levels.
Map_ID	Map_Name	Seqs	Seqs_Num	URL
ko00710	Carbon fixation in photosynthetic organisms	XP_004152516.1 NP_001267658.1 XP_004147146.1 XP_004137418.1 XP_004144412.1 O65194.1	6	http://www.kegg.jp/kegg-bin/show_pathway?ko00710+K00134+K01100+K00025+K01783+K00855+K01602
ko00010	Glycolysis / Gluconeogenesis	XP_004152516.1 XP_011656794.1 XP_004143301.1	3	http://www.kegg.jp/kegg-bin/show_pathway?ko00010+K00134+K00162+K01689
ko04066	HIF-1 signaling pathway	XP_004152516.1 XP_011656794.1 XP_004143301.1	3	http://www.kegg.jp/kegg-bin/show_pathway?ko04066+K00134+K00162+K01689
ko00940	Phenylpropanoid biosynthesis	AAA33129.1 XP_004142149.1	2	http://www.kegg.jp/kegg-bin/show_pathway?ko00940+K00430+K00430
ko00195	Photosynthesis	Q4VZG9.1 XP_011650288.1	2	http://www.kegg.jp/kegg-bin/show_pathway?ko00195+K02114+K02641
ko00270	Cysteine and methionine metabolism	XP_004138495.1 XP_004147146.1	2	http://www.kegg.jp/kegg-bin/show_pathway?ko00270+K13034+K00025
ko00020	Citrate cycle (TCA cycle)	XP_011656794.1 XP_004147146.1	2	http://www.kegg.jp/kegg-bin/show_pathway?ko00020+K00162+K00025
ko03050	Proteasome	XP_004141710.1 XP_004139931.1	2	http://www.kegg.jp/kegg-bin/show_pathway?ko03050+K02730+K03063
ko00630	Glyoxylate and dicarboxylate metabolism	XP_004147146.1 O65194.1	2	http://www.kegg.jp/kegg-bin/show_pathway?ko00630+K00025+K01602
ko00620	Pyruvate metabolism	XP_011656794.1 XP_004147146.1	2	http://www.kegg.jp/kegg-bin/show_pathway?ko00620+K00162+K00025
ko03013	RNA transport	XP_004141688.1 XP_004146811.1	2	http://www.kegg.jp/kegg-bin/show_pathway?ko03013+K03257+K03257
ko00030	Pentose phosphate pathway	XP_004137418.1 XP_004145948.1	2	http://www.kegg.jp/kegg-bin/show_pathway?ko00030+K01783+K01057
ko05010	Alzheimer disease	XP_004152516.1 YP_004849346.1	2	http://www.kegg.jp/kegg-bin/show_pathway?ko05010+K00134+K02132
ko00190	Oxidative phosphorylation	Q4VZG9.1 YP_004849346.1	2	http://www.kegg.jp/kegg-bin/show_pathway?ko00190+K02114+K02132
ko00460	Cyanoamino acid metabolism	XP_004138495.1	1	http://www.kegg.jp/kegg-bin/show_pathway?ko00460+K13034
ko05418	Fluid shear stress and atherosclerosis	XP_004147762.1	1	http://www.kegg.jp/kegg-bin/show_pathway?ko05418+K00799
ko04964	Proximal tubule bicarbonate reclamation	XP_004147146.1	1	http://www.kegg.jp/kegg-bin/show_pathway?ko04964+K00025
ko00480	Glutathione metabolism	XP_004147762.1	1	http://www.kegg.jp/kegg-bin/show_pathway?ko00480+K00799
ko00910	Nitrogen metabolism	XP_004141091.2	1	http://www.kegg.jp/kegg-bin/show_pathway?ko00910+K01673
ko00680	Methane metabolism	XP_004143301.1	1	http://www.kegg.jp/kegg-bin/show_pathway?ko00680+K01689
ko03018	RNA degradation	XP_004143301.1	1	http://www.kegg.jp/kegg-bin/show_pathway?ko03018+K01689
ko05169	Epstein-Barr virus infection	XP_004139931.1	1	http://www.kegg.jp/kegg-bin/show_pathway?ko05169+K03063
ko05200	Pathways in cancer	XP_004147762.1	1	http://www.kegg.jp/kegg-bin/show_pathway?ko05200+K00799
ko04922	Glucagon signaling pathway	XP_011656794.1	1	http://www.kegg.jp/kegg-bin/show_pathway?ko04922+K00162
ko00196	Photosynthesis - antenna proteins	XP_004148579.1	1	http://www.kegg.jp/kegg-bin/show_pathway?ko00196+K08912
ko00603	Glycosphingolipid biosynthesis - globo and isoglobo series	NP_001267500.1	1	http://www.kegg.jp/kegg-bin/show_pathway?ko00603+K07407
ko01524	Platinum drug resistance	XP_004147762.1	1	http://www.kegg.jp/kegg-bin/show_pathway?ko01524+K00799
ko00561	Glycerolipid metabolism	NP_001267500.1	1	http://www.kegg.jp/kegg-bin/show_pathway?ko00561+K07407
ko00052	Galactose metabolism	NP_001267500.1	1	http://www.kegg.jp/kegg-bin/show_pathway?ko00052+K07407
ko00521	Streptomycin biosynthesis	XP_004149141.2	1	http://www.kegg.jp/kegg-bin/show_pathway?ko00521+K01858
ko04714	Thermogenesis	YP_004849346.1	1	http://www.kegg.jp/kegg-bin/show_pathway?ko04714+K02132
ko00770	Pantothenate and CoA biosynthesis	XP_004136850.1	1	http://www.kegg.jp/kegg-bin/show_pathway?ko00770+K00053
ko00040	Pentose and glucuronate interconversions	XP_004137418.1	1	http://www.kegg.jp/kegg-bin/show_pathway?ko00040+K01783
ko00230	Purine metabolism	XP_004143844.1	1	http://www.kegg.jp/kegg-bin/show_pathway?ko00230+K01933
ko00982	Drug metabolism - cytochrome P450	XP_004147762.1	1	http://www.kegg.jp/kegg-bin/show_pathway?ko00982+K00799
ko00290	Valine, leucine and isoleucine biosynthesis	XP_004136850.1	1	http://www.kegg.jp/kegg-bin/show_pathway?ko00290+K00053
ko05130	Pathogenic Escherichia coli infection	XP_004137828.1	1	http://www.kegg.jp/kegg-bin/show_pathway?ko05130+K11294
ko05230	Central carbon metabolism in cancer	XP_011656794.1	1	http://www.kegg.jp/kegg-bin/show_pathway?ko05230+K00162
ko05204	Chemical carcinogenesis	XP_004147762.1	1	http://www.kegg.jp/kegg-bin/show_pathway?ko05204+K00799
ko04141	Protein processing in endoplasmic reticulum	XP_004149798.1	1	http://www.kegg.jp/kegg-bin/show_pathway?ko04141+K09580
ko00983	Drug metabolism - other enzymes	XP_004147762.1	1	http://www.kegg.jp/kegg-bin/show_pathway?ko00983+K00799
ko00562	Inositol phosphate metabolism	XP_004149141.2	1	http://www.kegg.jp/kegg-bin/show_pathway?ko00562+K01858
ko00920	Sulfur metabolism	XP_004138495.1	1	http://www.kegg.jp/kegg-bin/show_pathway?ko00920+K13034
ko00220	Arginine biosynthesis	XP_004148484.1	1	http://www.kegg.jp/kegg-bin/show_pathway?ko00220+K01438
ko05012	Parkinson disease	YP_004849346.1	1	http://www.kegg.jp/kegg-bin/show_pathway?ko05012+K02132
ko00600	Sphingolipid metabolism	NP_001267500.1	1	http://www.kegg.jp/kegg-bin/show_pathway?ko00600+K07407
ko00980	Metabolism of xenobiotics by cytochrome P450	XP_004147762.1	1	http://www.kegg.jp/kegg-bin/show_pathway?ko00980+K00799
ko05016	Huntington disease	YP_004849346.1	1	http://www.kegg.jp/kegg-bin/show_pathway?ko05016+K02132
ko05225	Hepatocellular carcinoma	XP_004147762.1	1	http://www.kegg.jp/kegg-bin/show_pathway?ko05225+K00799

## Sheet: b
Table S5b KEGG pathway analysis of DEPs at proteomic levels after cleaning duplicate pathways or unrelated pathways
Map_ID	Map_Name	Seqs	Seqs_Num	URL
ko00710	Photosynthesis	XP_004152516.1 、NP_001267658.1、 XP_004137418.1、 XP_004144412.1、 Q4VZG9.1、 XP_011650288.1 、 XP_004148579.1	7	http://www.kegg.jp/kegg-bin/show_pathway?ko00710+K00134+K01100+K00025+K01783+K00855+K01602
ko00010	Energy metabolism	XP_011656794.1 、XP_004143301.1、 YP_004849346.1、XP_004136850.1 XP_004145948.1、O65194.1	6	http://www.kegg.jp/kegg-bin/show_pathway?ko00010+K00134+K00162+K01689
ko00940	Amino acid biosynthesis	AAA33129.1 、XP_004142149.1、 XP_004136850.1 、 XP_004148484.1	4	http://www.kegg.jp/kegg-bin/show_pathway?ko00940+K00430+K00430
ko00270	Sulfur , Cysteine and methionine metabolism	XP_004138495.1 、XP_004147146.1、 XP_004143301.1	3	http://www.kegg.jp/kegg-bin/show_pathway?ko00270+K13034+K00025
ko03050	Proteasome	XP_004141710.1 、XP_004139931.1	2	http://www.kegg.jp/kegg-bin/show_pathway?ko03050+K02730+K03063
ko03013	RNA transport	XP_004141688.1	1	http://www.kegg.jp/kegg-bin/show_pathway?ko03013+K03257+K03257
ko00480	Glutathione metabolism	XP_004147762.1	1	http://www.kegg.jp/kegg-bin/show_pathway?ko00480+K00799
ko00910	Nitrogen metabolism	XP_004141091.2	1	http://www.kegg.jp/kegg-bin/show_pathway?ko00910+K01673
ko00603	Lipid metabolism	NP_001267500.1	1	http://www.kegg.jp/kegg-bin/show_pathway?ko00603+K07407
ko00230	Purine metabolism	XP_004143844.1	1	http://www.kegg.jp/kegg-bin/show_pathway?ko00230+K01933
ko04141	Protein processing in endoplasmic reticulum	XP_004149798.1	1	http://www.kegg.jp/kegg-bin/show_pathway?ko04141+K09580
ko00562	Inositol phosphate metabolism	XP_004149141.2	1	http://www.kegg.jp/kegg-bin/show_pathway?ko00562+K01858
			29
